# Supplementary material
Source: PubMed Central journal article supplement (PMC4450333)

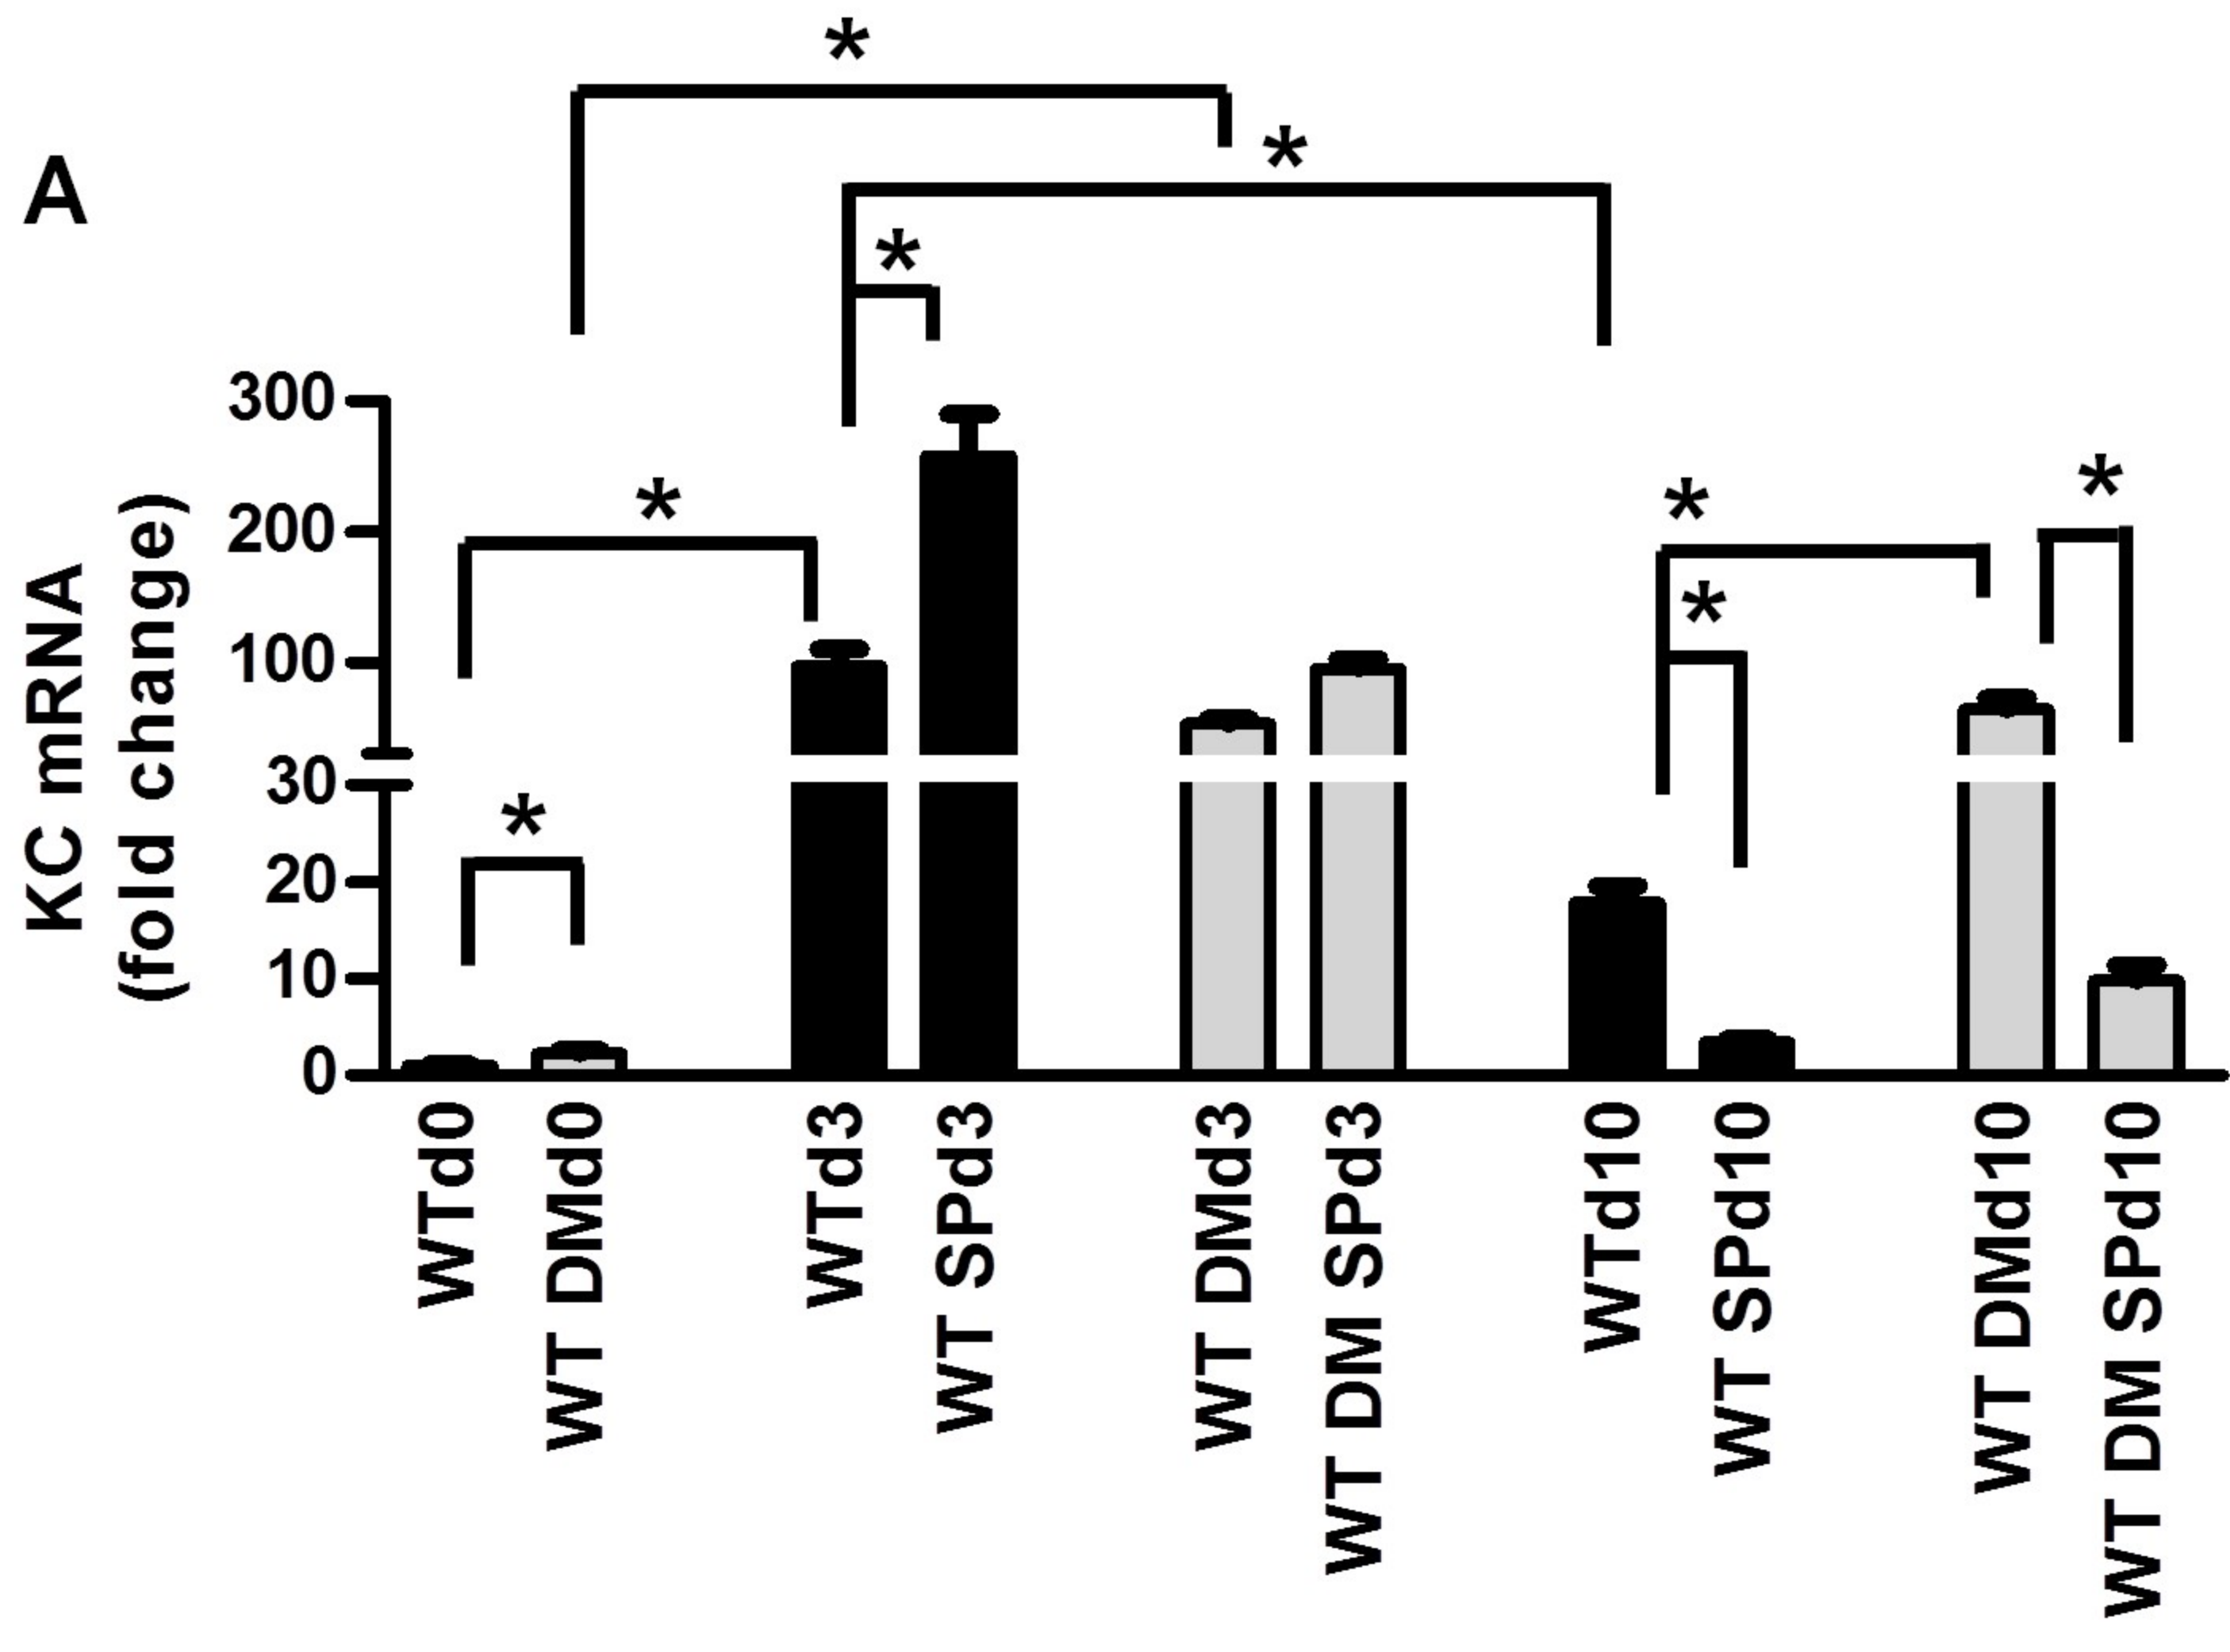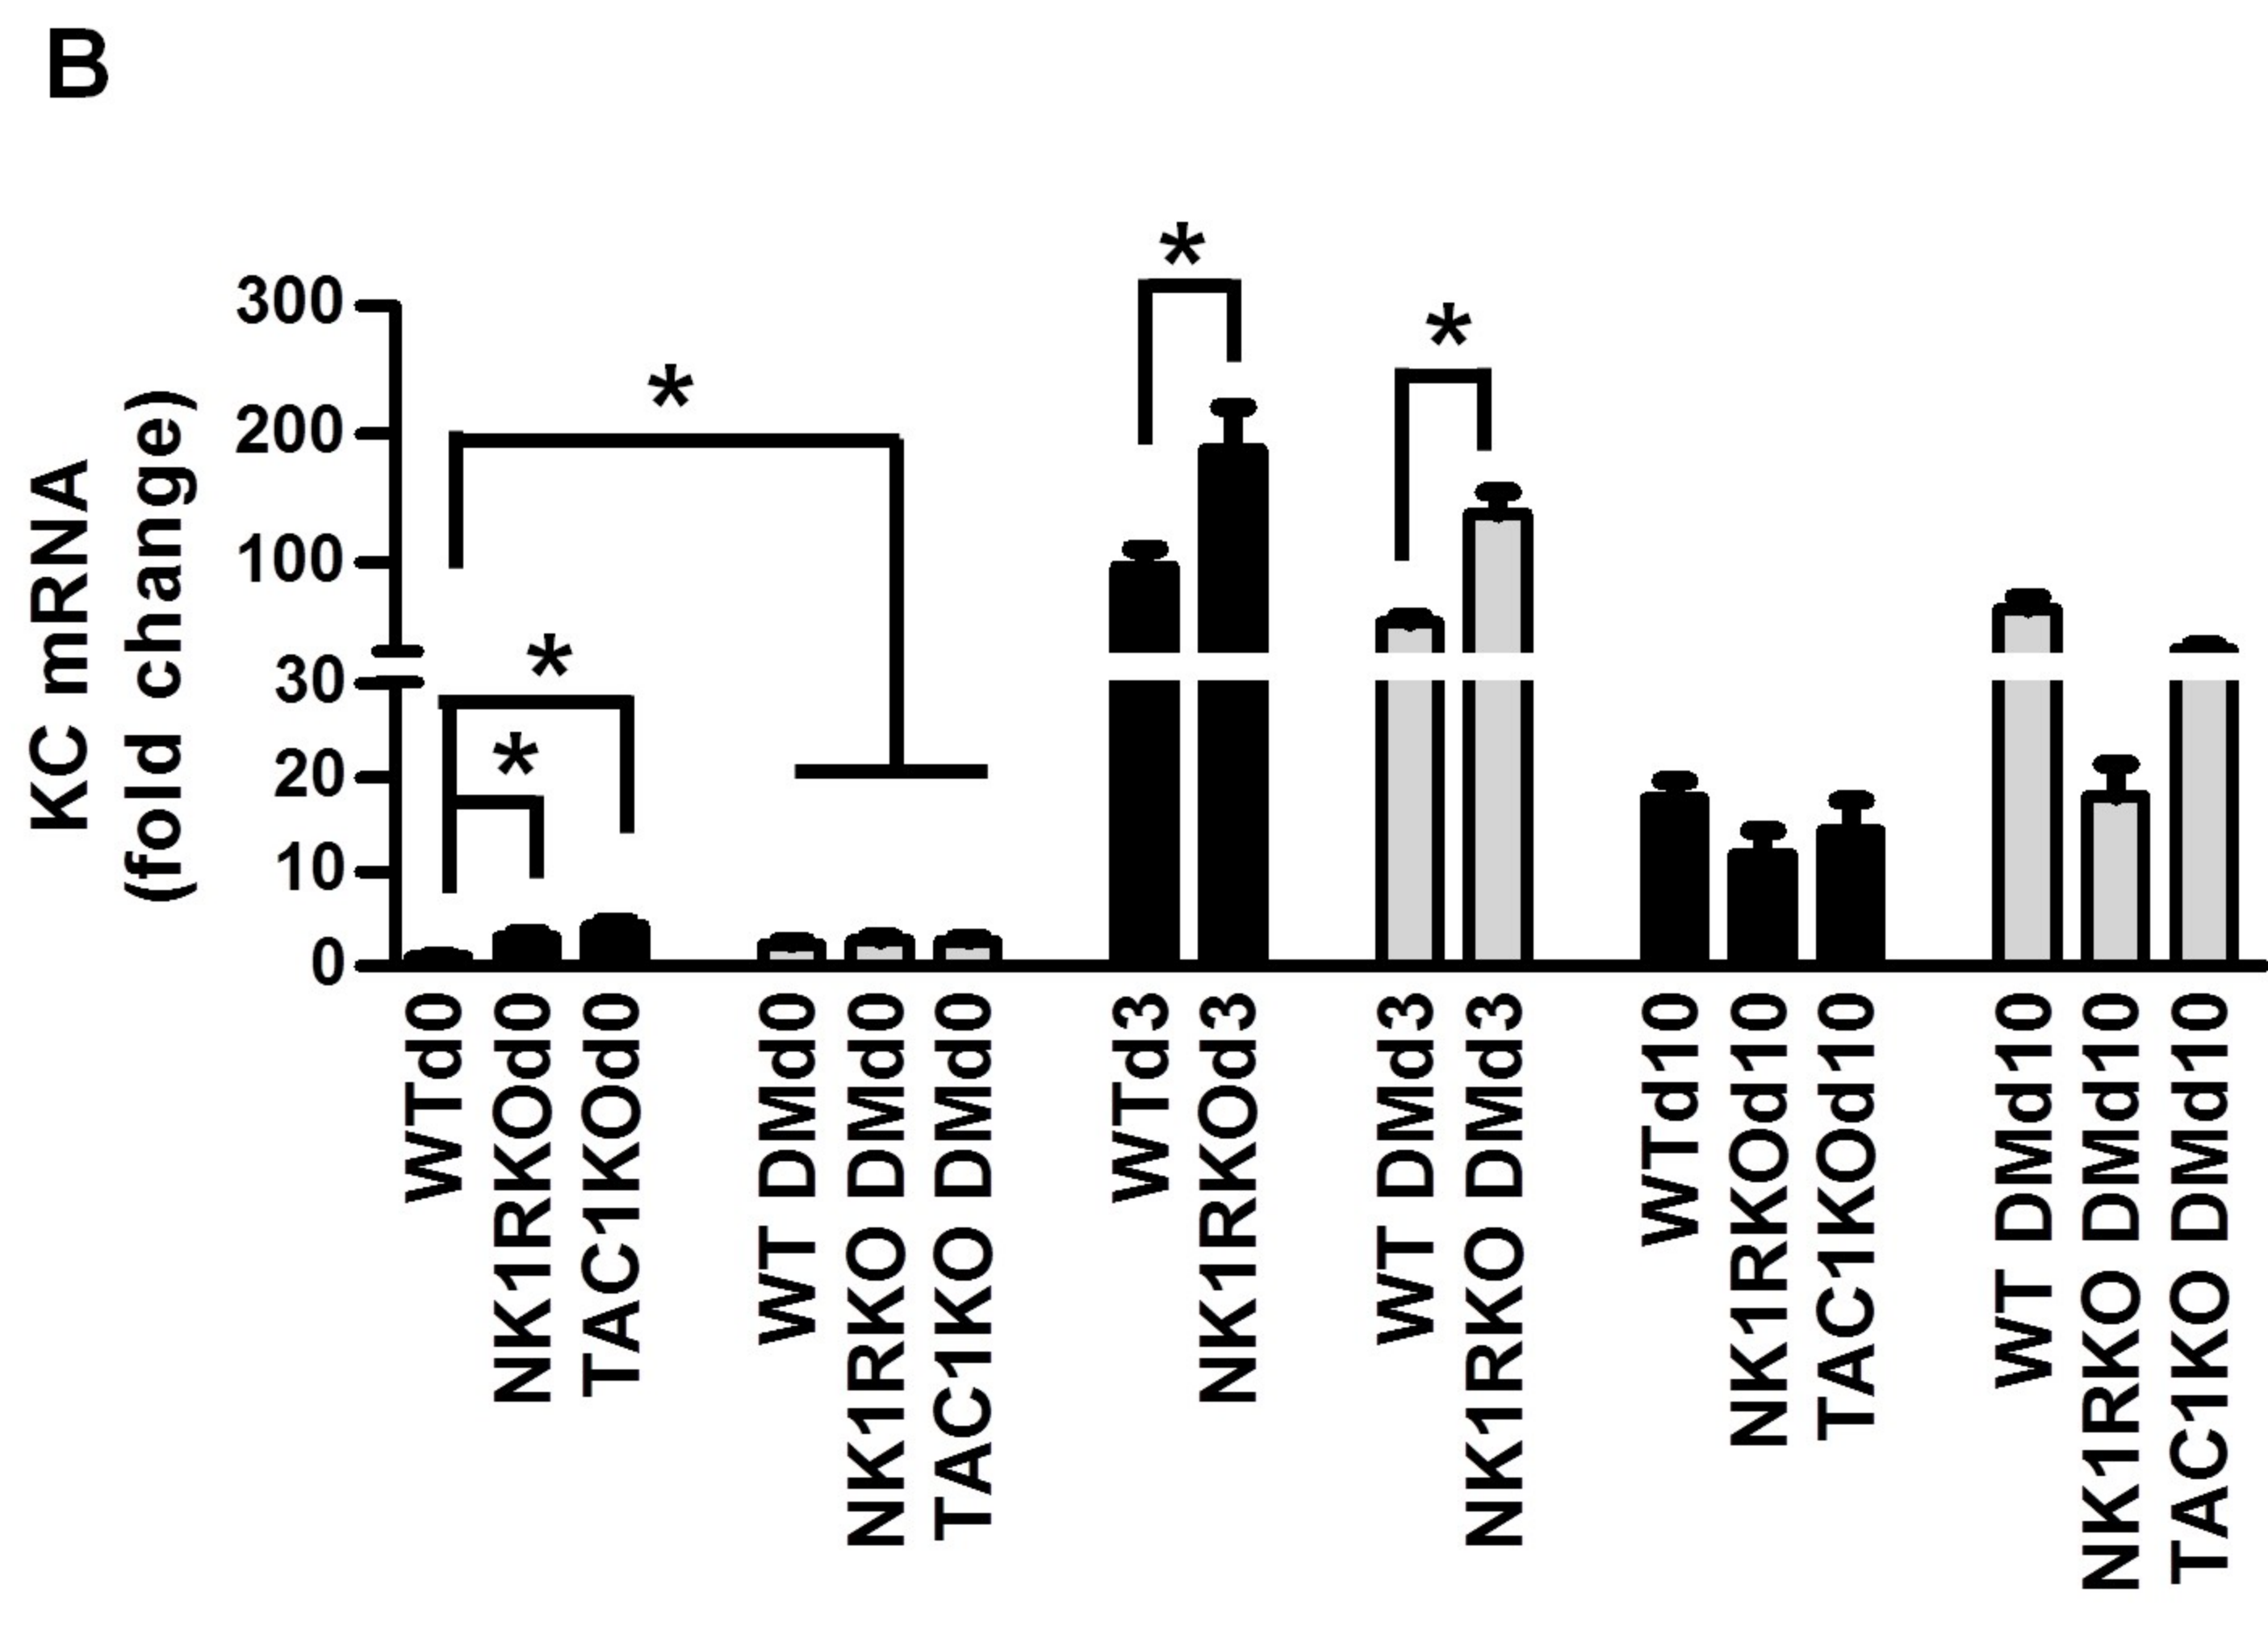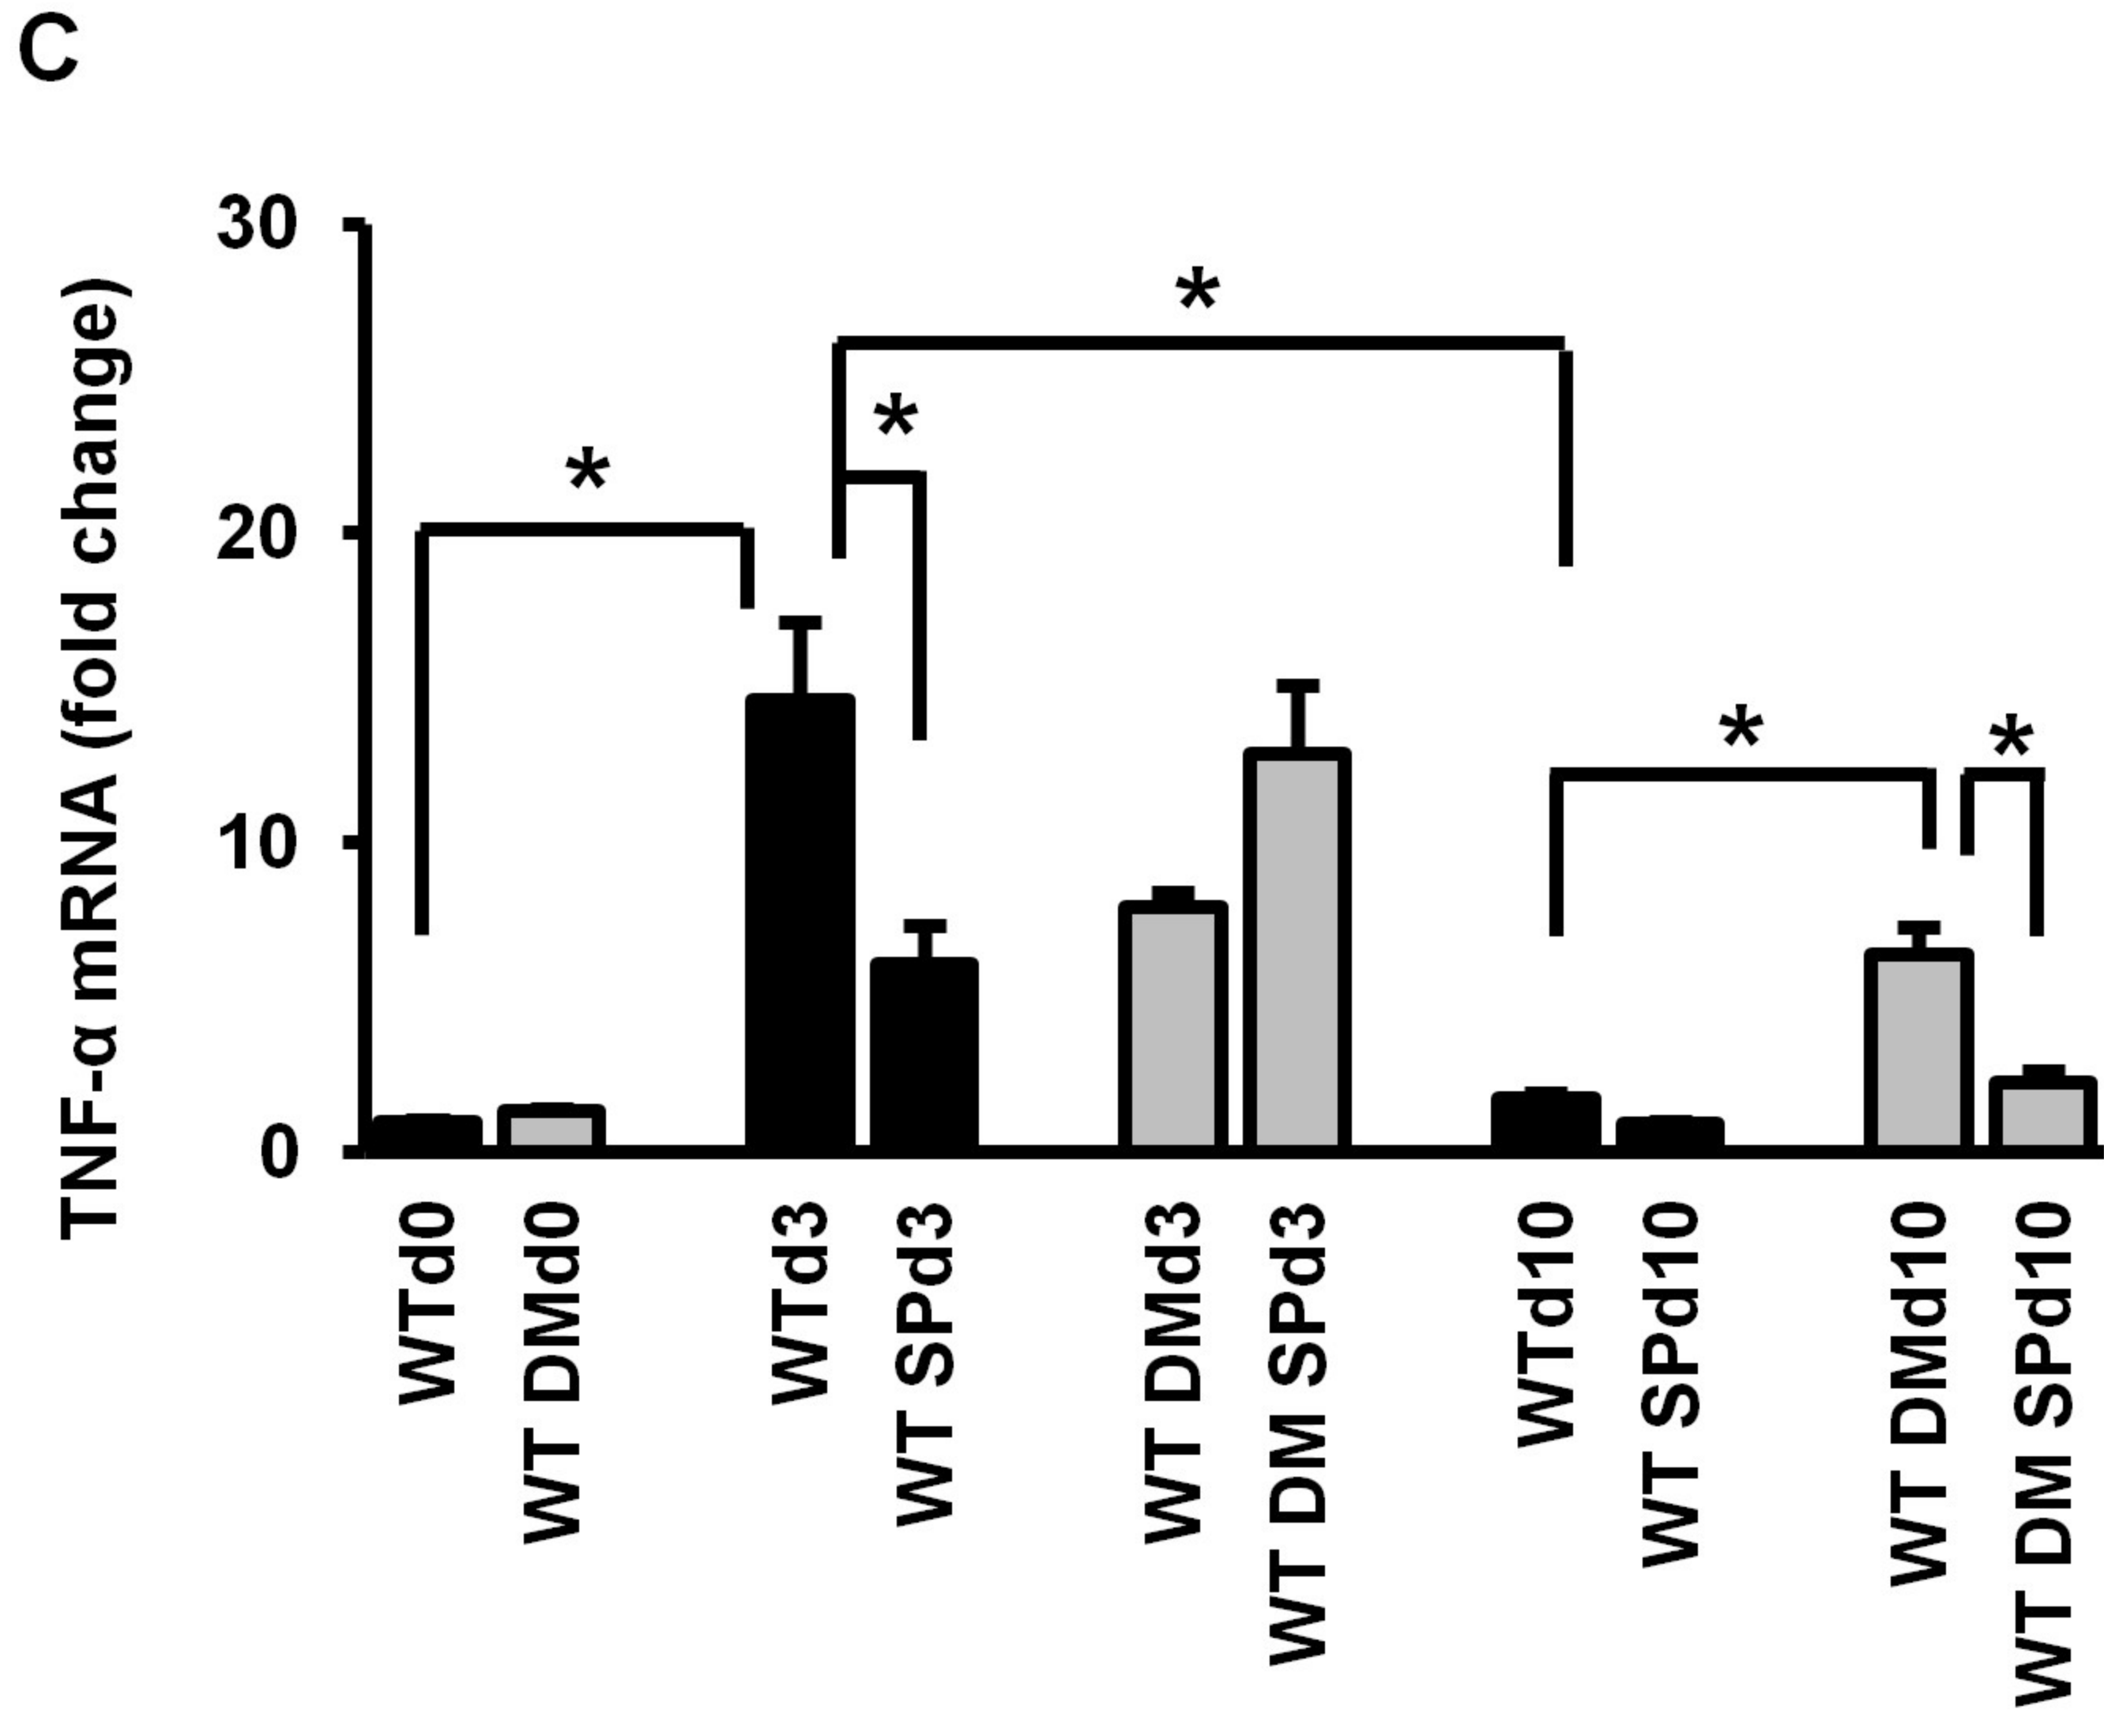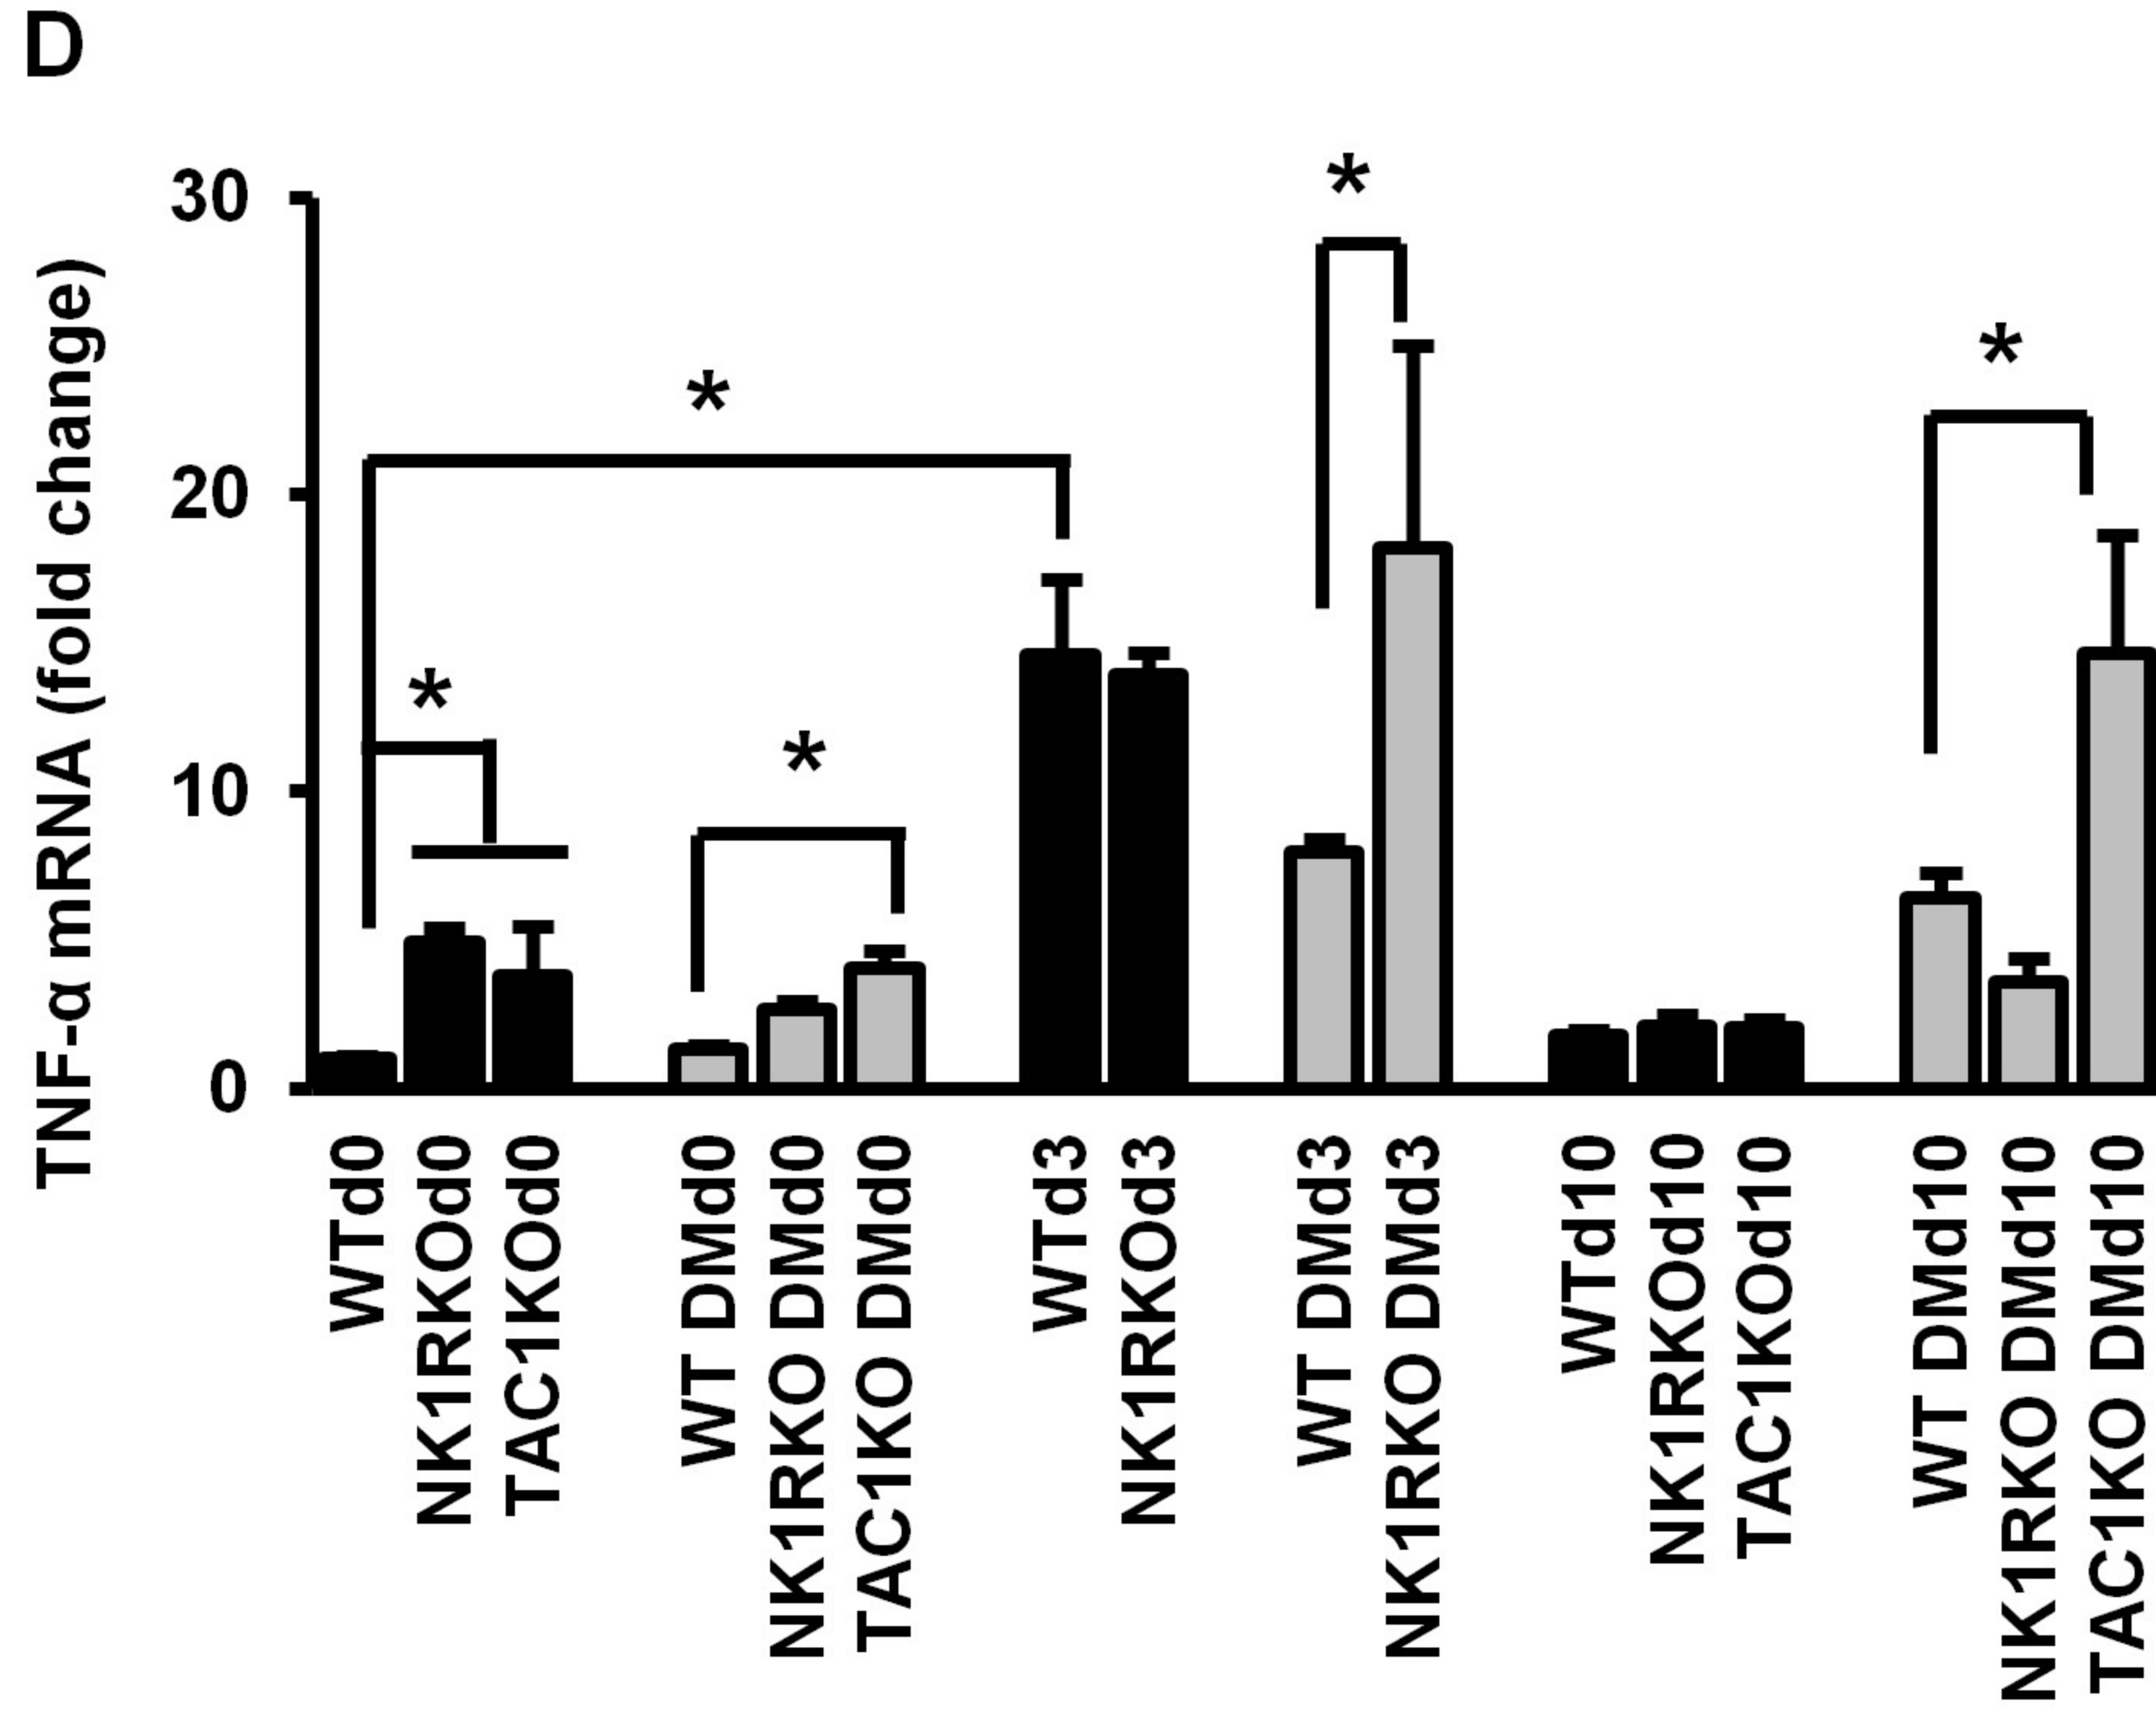

Supplement: mmc1.pdf [file mmc1.pdf]

A

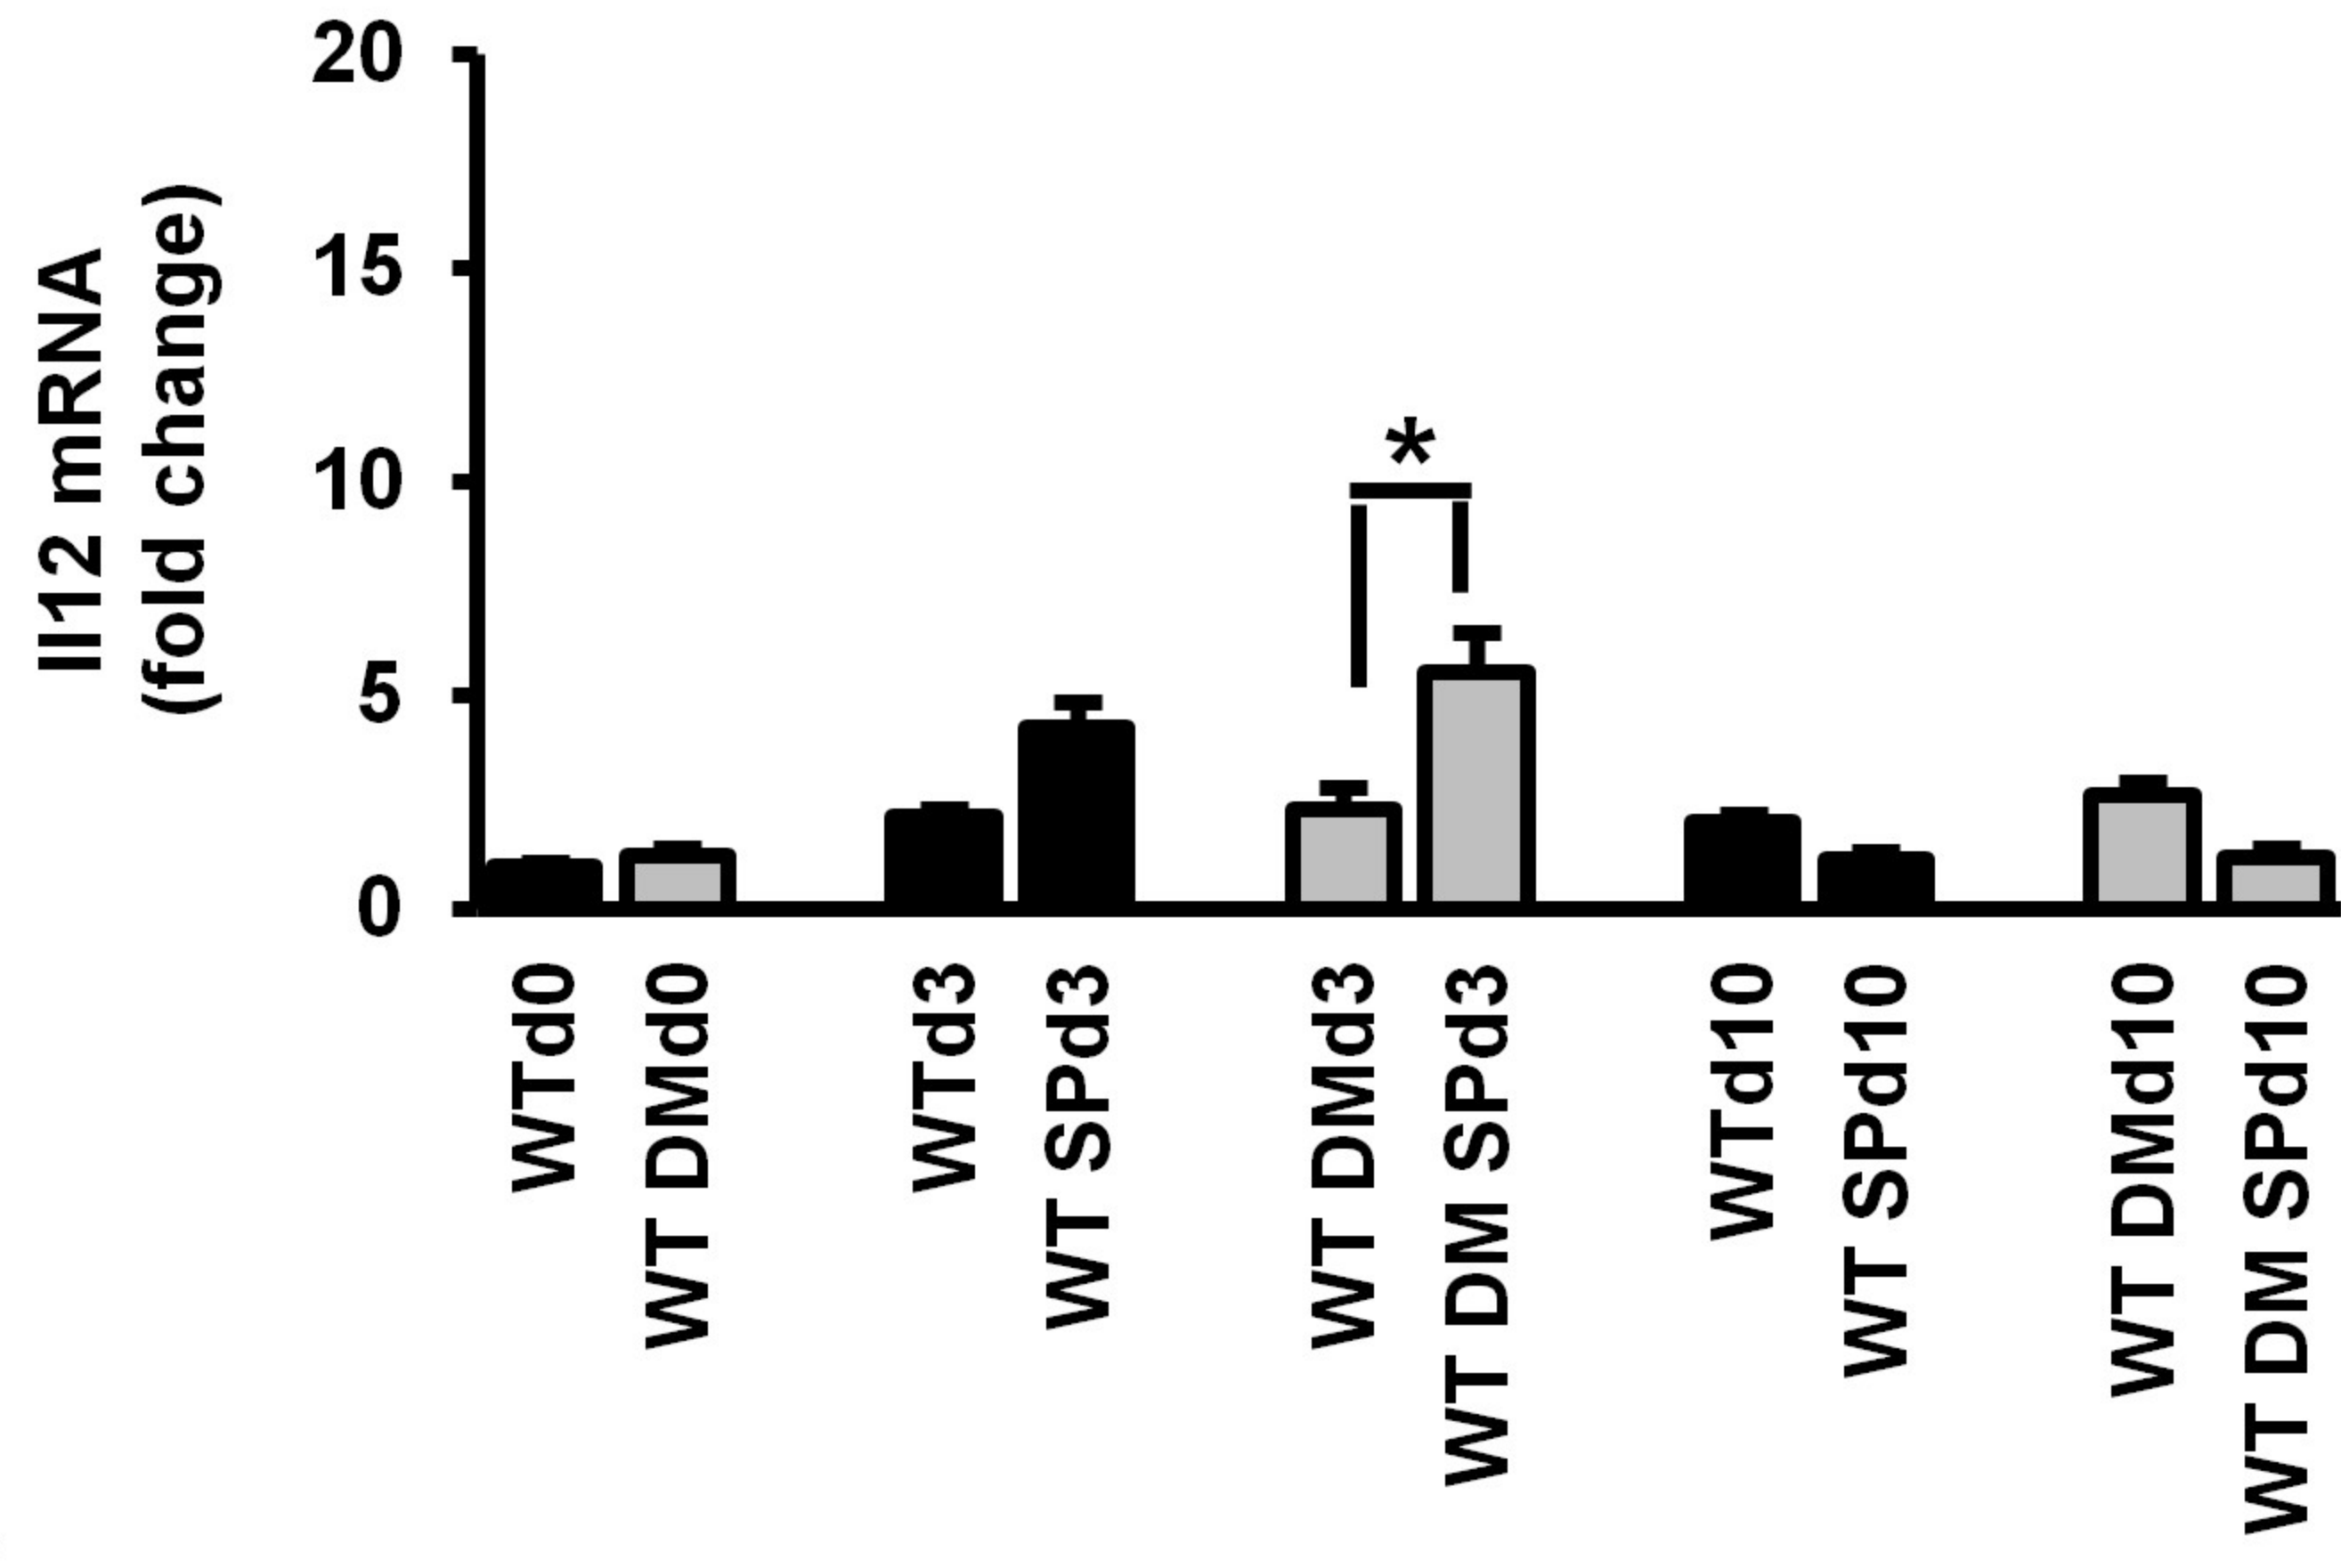

B

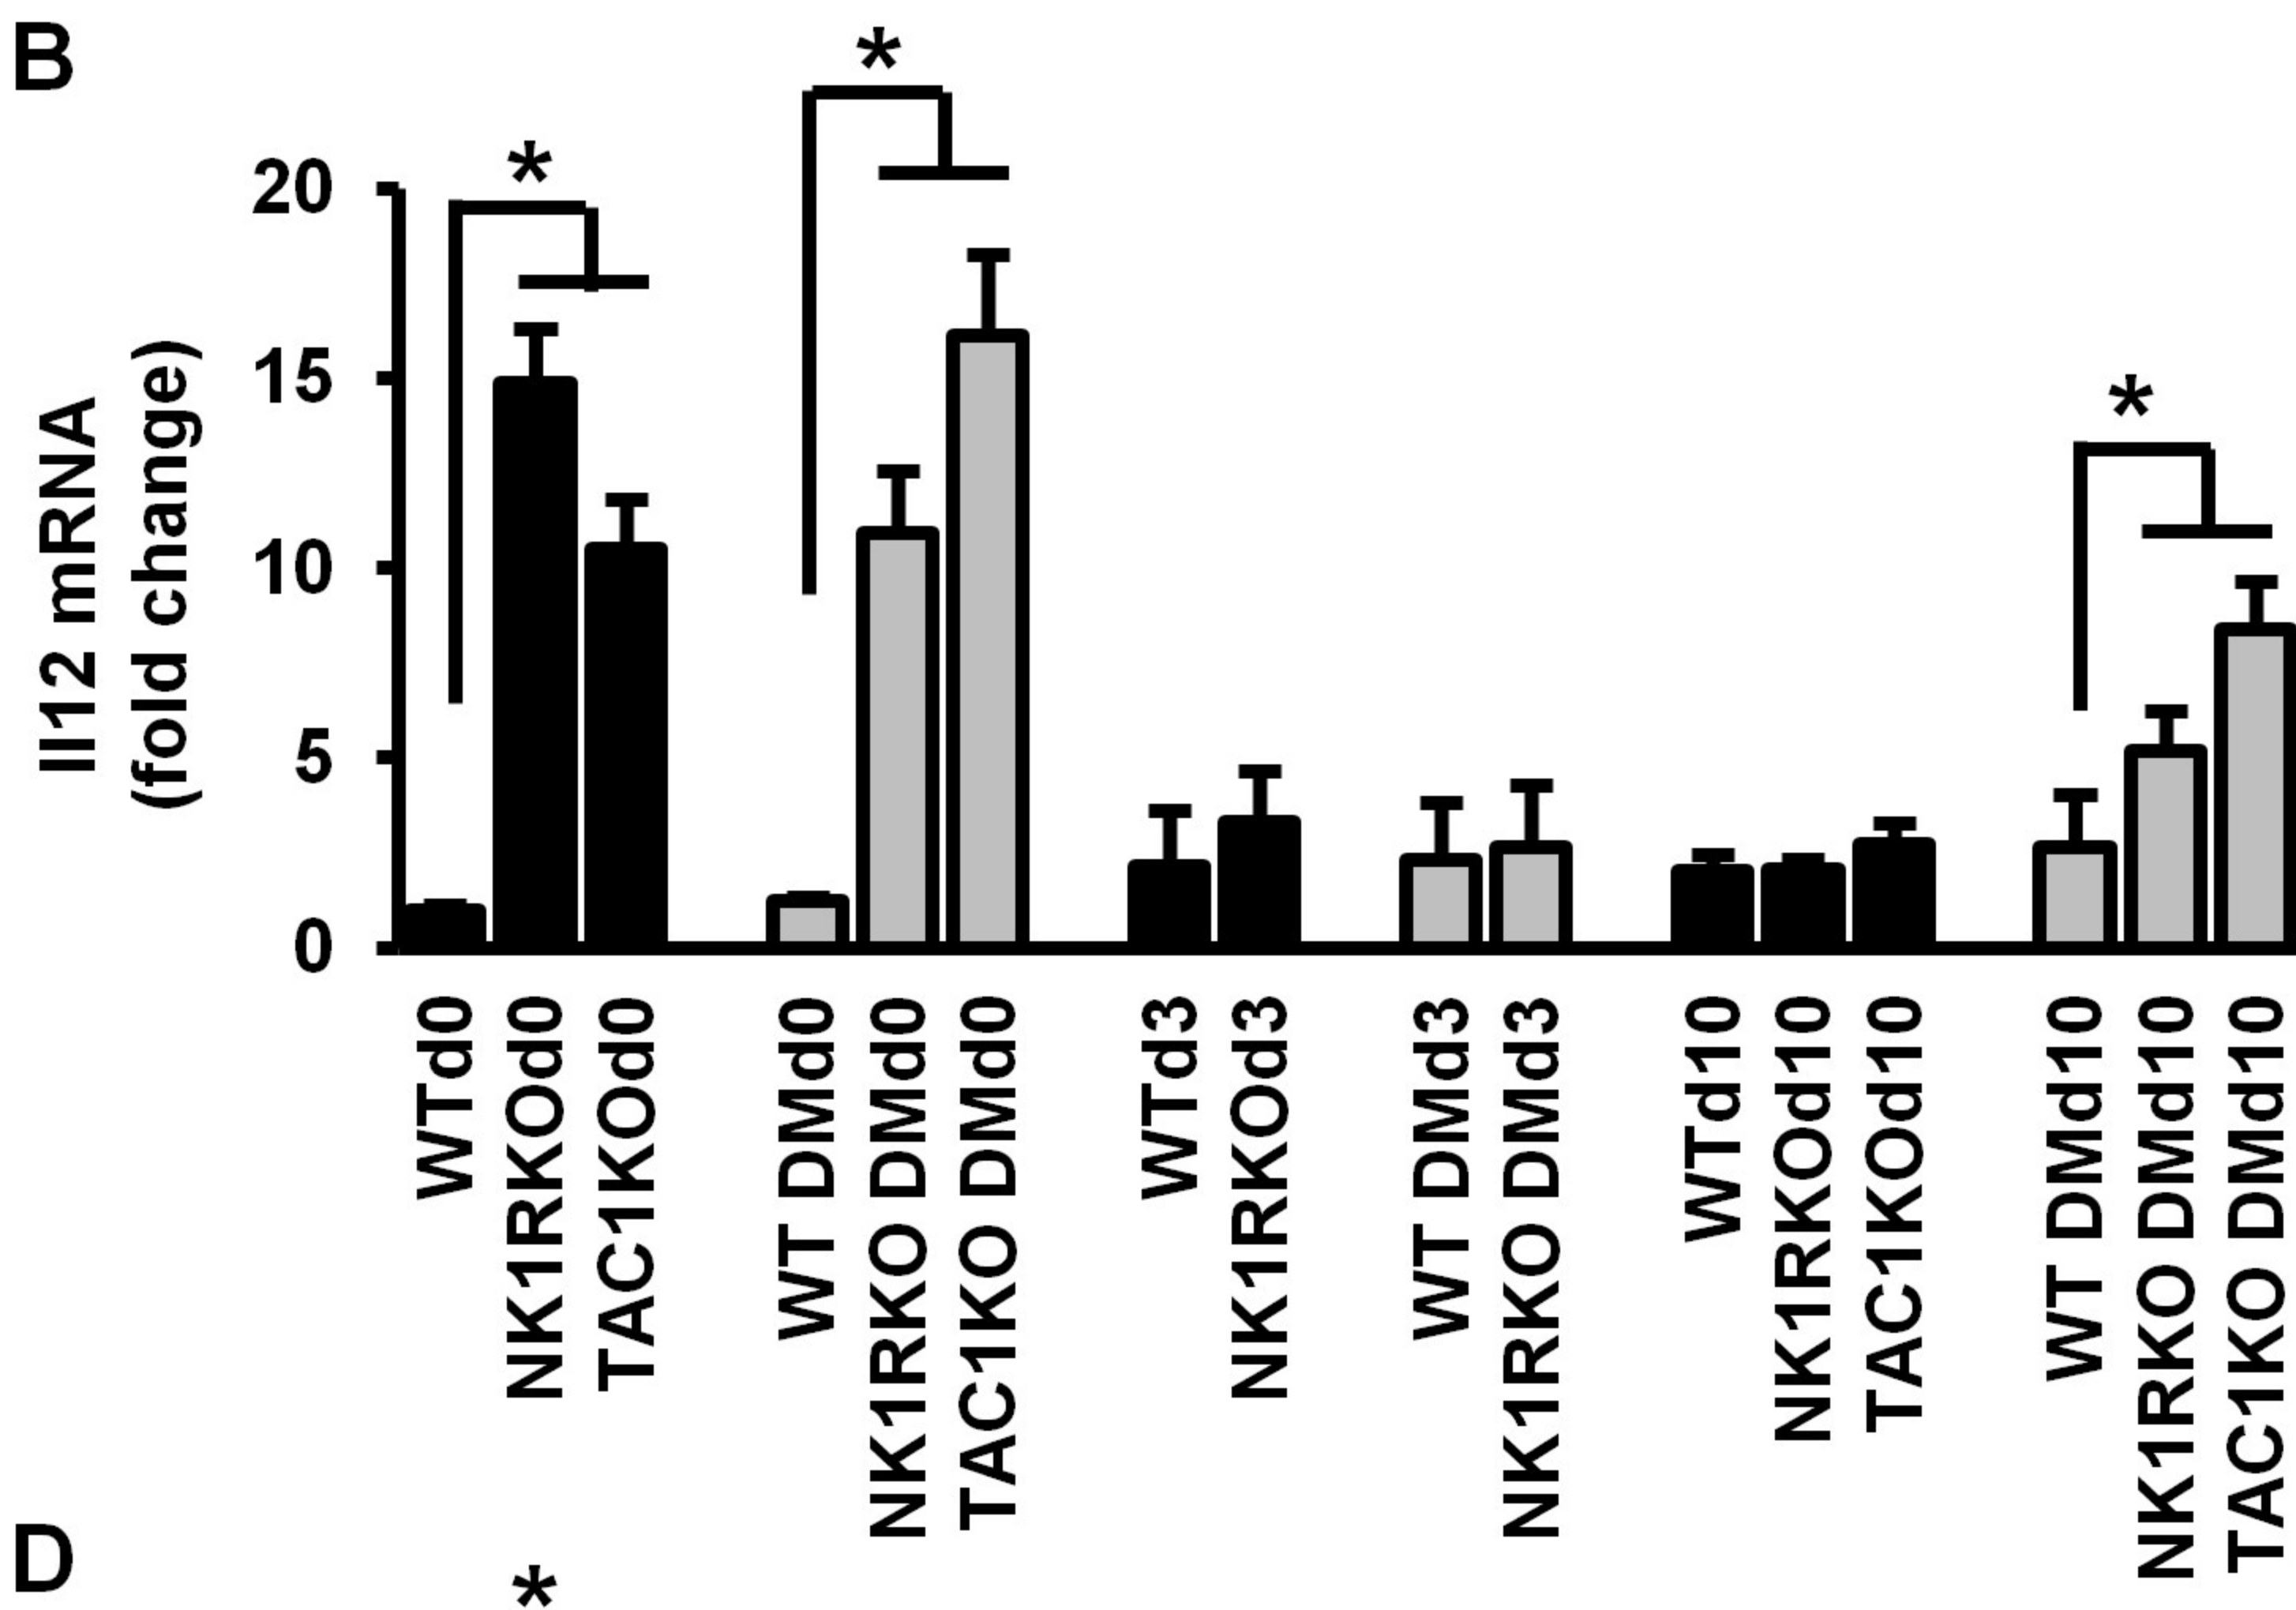

C

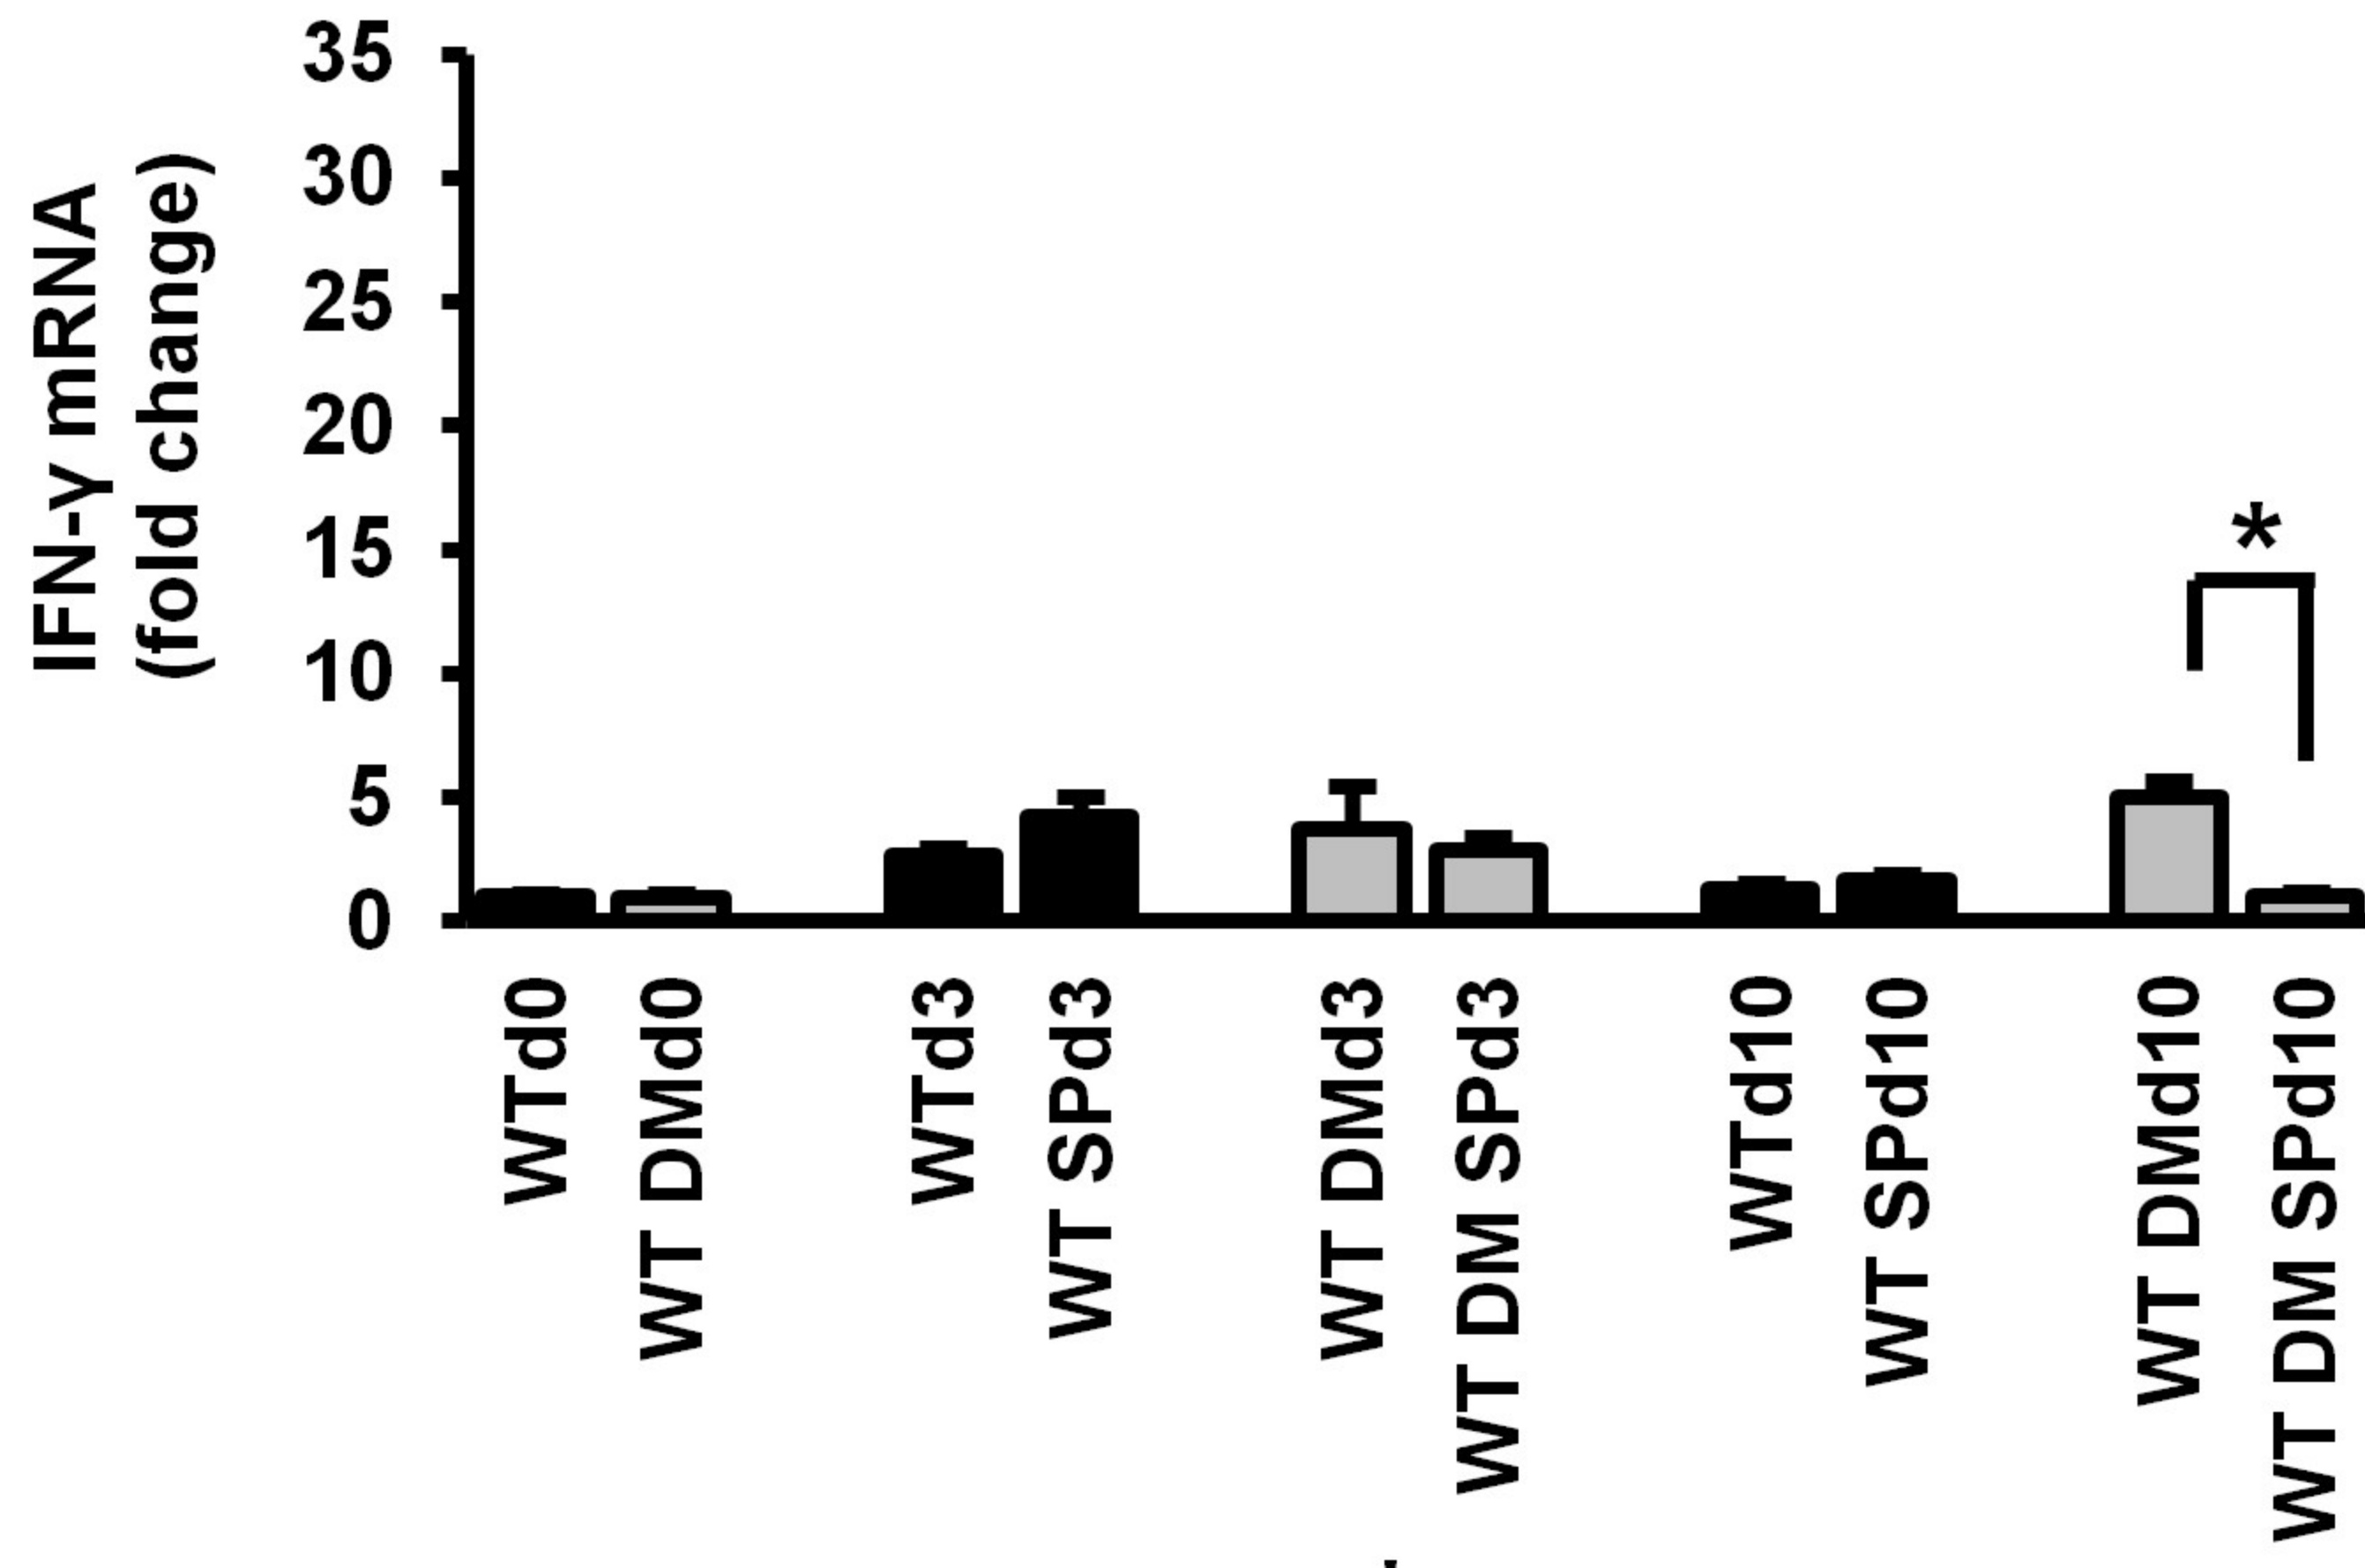

D

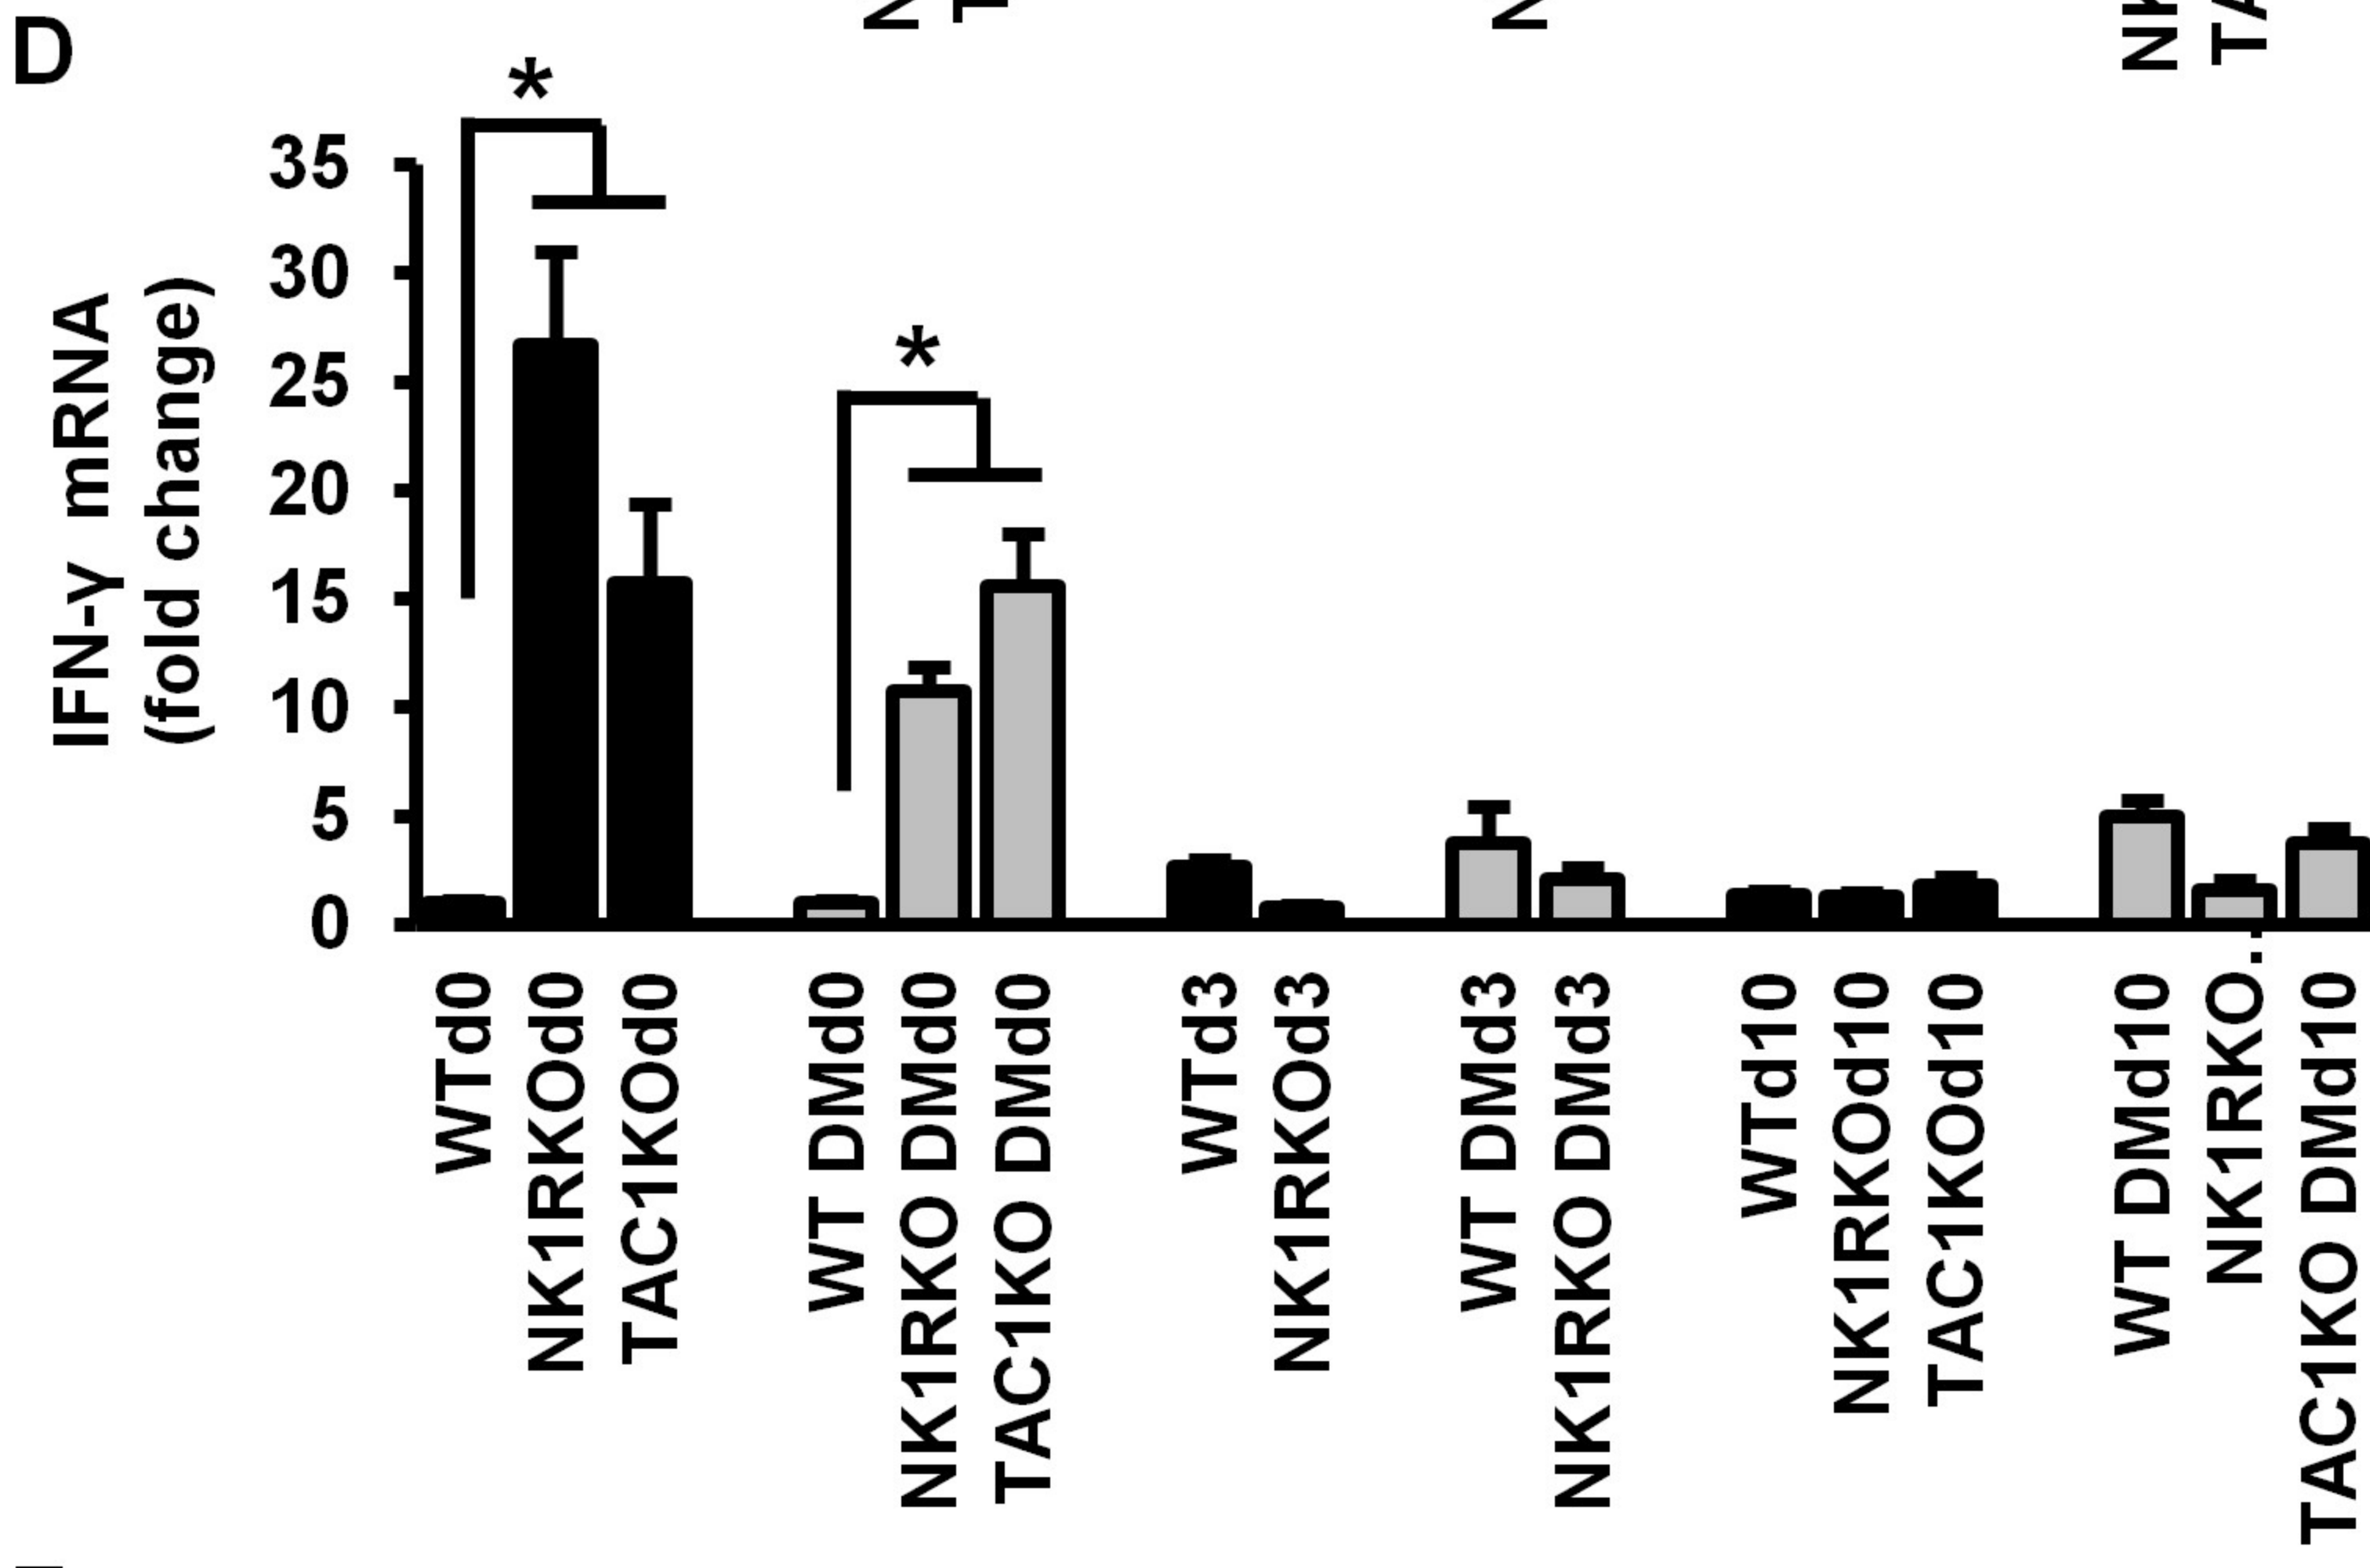

E

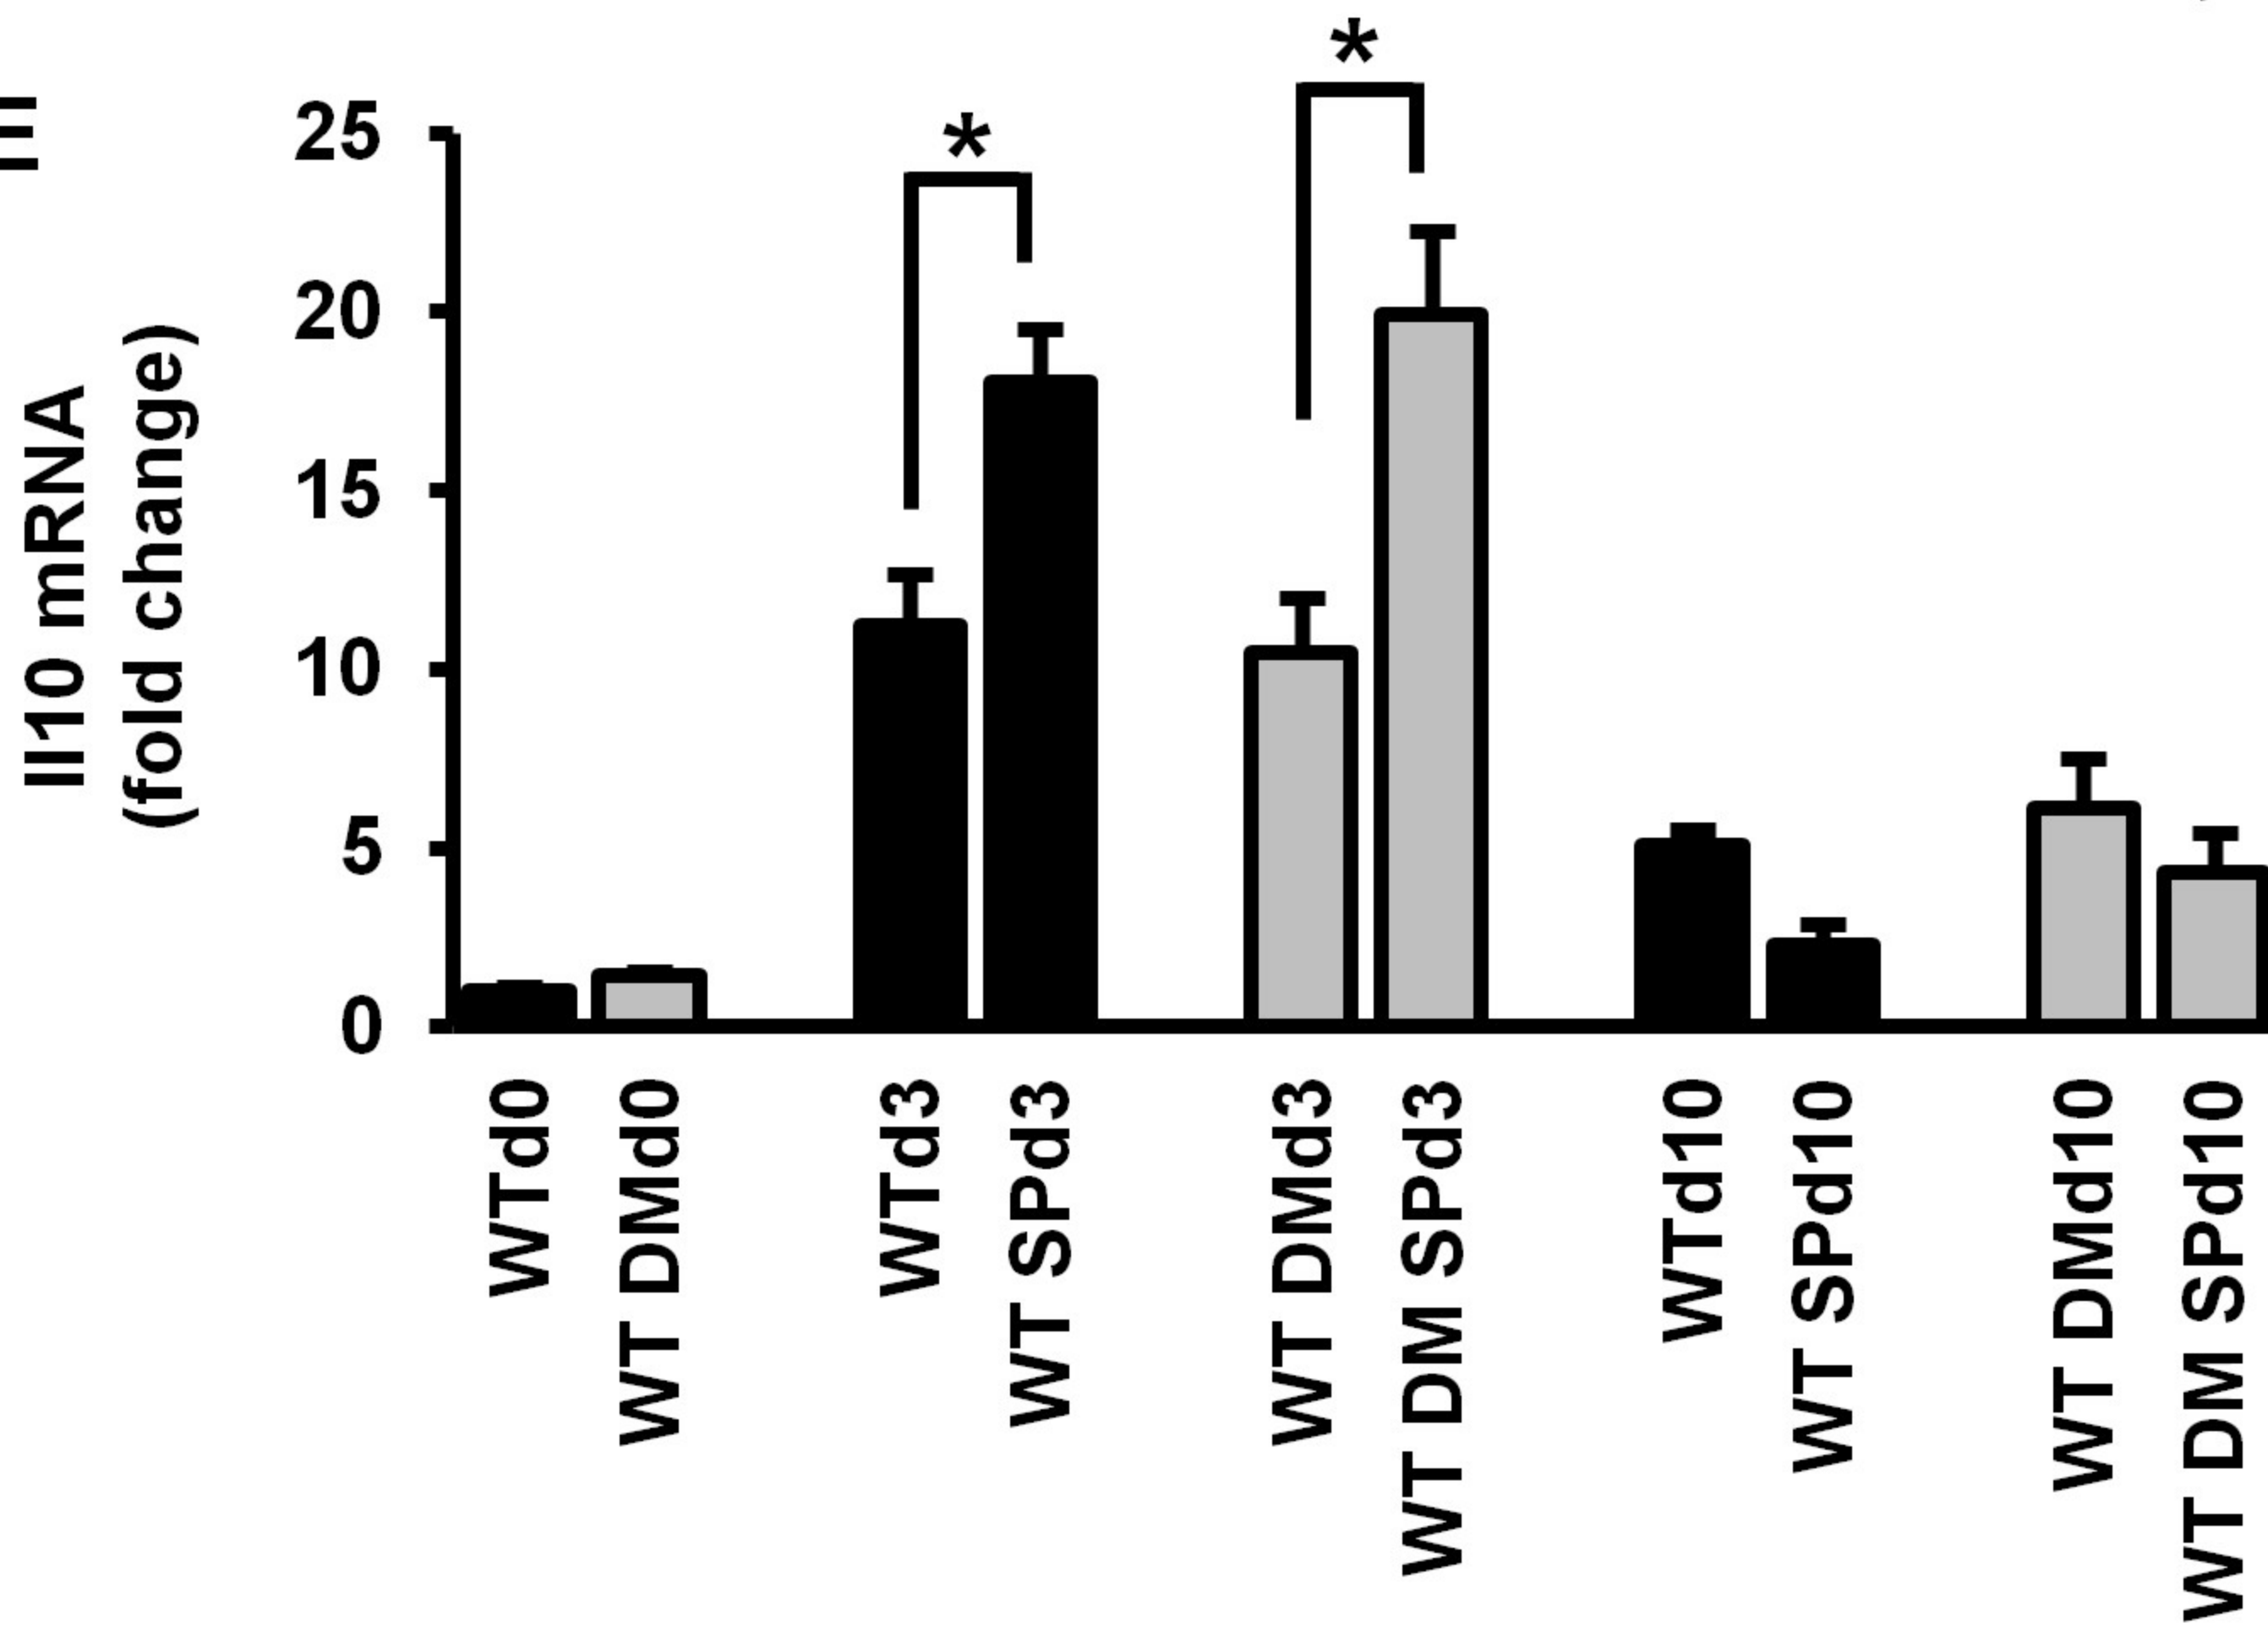

F

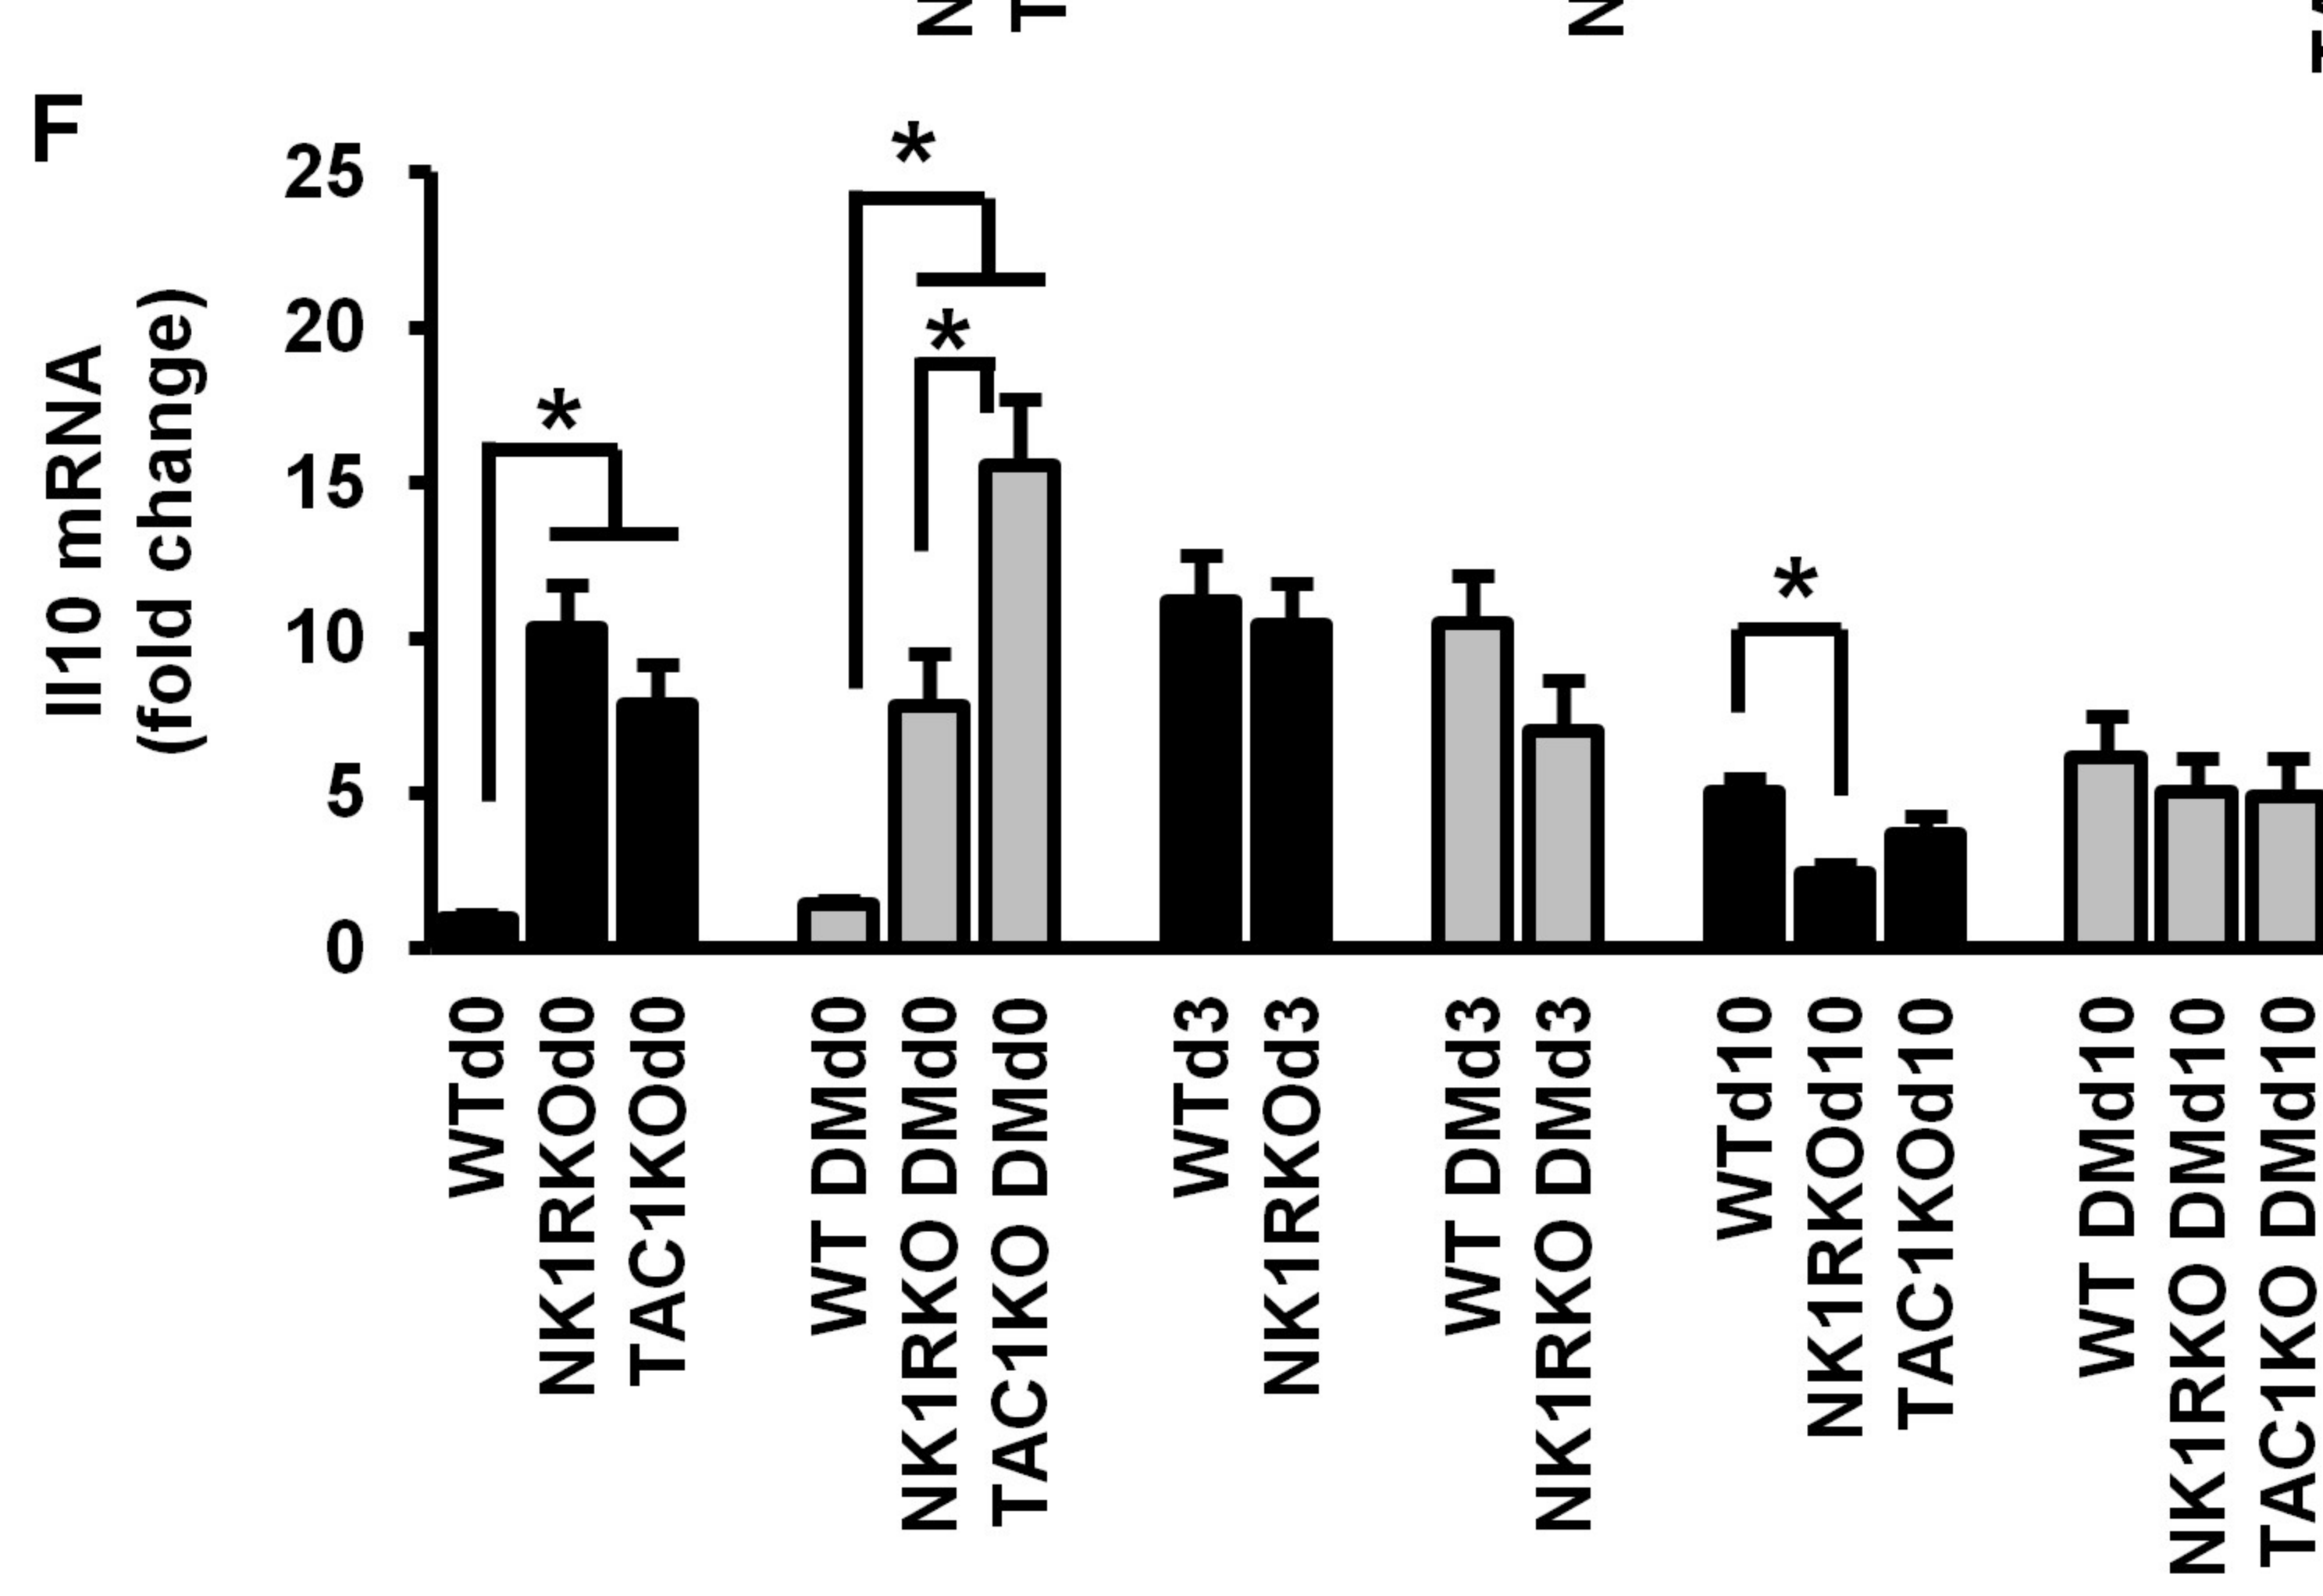

Supplement: mmc2.pdf [file mmc2.pdf]
